# FLEXIBILITY IN LOCOMOTOR-FEEDING INTEGRATION DURING PREY CAPTURE IN VARANID LIZARDS: EFFECTS OF PREY SIZE AND VELOCITY

Stéphane J. Montuelle<sup>1</sup>, Anthony Herrel<sup>2</sup>, Paul-Antoine Libourel<sup>3</sup>, Sandra Daillie<sup>2</sup> and  
 Vincent L. Bels<sup>4</sup>

1: Ohio University, Heritage College of Osteopathic Medicine, Department of Biomedical  
 Sciences – Athens, OH, USA

2: Muséum National d'Histoire Naturelle, Département Ecologie et Gestion de la  
 Biodiversité, UMR 7179 – Paris, France

3 : Université Lyon 1, Institut fédératif des Neurosciences, UMR 5167 – Lyon, France

4 : Muséum National d'Histoire Naturelle, Département Systematics and Evolution,  
 UMR 7205 – Paris, France

# manuscript pages: 20

# words: 7282

# tables: 3

# figures: 9

## **Address for correspondence:**

Stéphane J. Montuelle  
 Ohio University - Heritage College of Osteopathic Medicine  
 Department of Biomedical Sciences  
 Irvine Hall 228  
 Athens, OH 45701-2979

E-mail: montuell@ohiou.edu

## ABSTRACT

Feeding movements are adjusted in response to food properties, and this flexibility is essential for omnivorous predators as food properties vary routinely. In most lizards, prey capture is no longer considered to solely rely on the movements of the feeding structures (jaws, hyolingual apparatus), but instead is understood to require the integration of the feeding system with the locomotor system (i.e., coordination of movements). Here, we investigate flexibility in the coordination pattern between jaw, neck and forelimb movements in omnivorous varanid lizards feeding on four prey types varying in length and mobility: grasshoppers, live newborn mice, adult mice and dead adult mice. We test for bivariate correlations between 3D locomotor and feeding kinematics, and compare the jaw-neck-forelimb coordination patterns across prey types. Our results reveal that locomotor-feeding integration is essential for the capture of evasive prey, and that different jaw-neck-forelimb coordination patterns are used to capture different prey types. Jaw-neck-forelimb coordination is indeed significantly altered by the length and speed of the prey, indicating that a similar coordination pattern can be finely tuned in response to prey stimuli. These results suggest feed-forward as well as feedback modulation of the control of locomotor-feeding integration. As varanids are considered to be specialized in the capture of evasive prey (although they retain their ability to feed on a wide variety of prey items), flexibility in locomotor-feeding integration in response to prey mobility is proposed to be a key component in their dietary specialization.

## KEY WORDS

Integration; Flexibility; Prey properties; *Varanus*; Kinematics; Jaw prehension

## RUNNING TITLE

Flexible locomotor-feeding integration

## INTRODUCTION

In many vertebrate lineages, the function and morphology of the feeding structures are influenced by the adaptive pressures that stem from diet. This includes adaptation of the jaw apparatus (e.g., Rodriguez-Robles et al., 1999; Ferry-Graham et al., 2002; Van Cakenberghe et al., 2002; Metzger and Herrel, 2005; Santana et al., 2010; Hampton, 2011; Perry et al., 2011), of the teeth (e.g., Hotton, 1955; Herrel et al., 1997; Herrel et al., 2004; Santana et al., 2011; Kupczik and Stynder, 2012), of the hyolingual apparatus (e.g., Bels et al., 1994; Schwenk, 2000; Bels, 2003; Meyers and Herrel, 2005; Schwenk and Rubega, 2005; Herrel et al., 2009), and of the digestive track (O'Grady et al., 2005; Herrel et al., 2008; Griffen and Mosblack, 2011). From a functional perspective, feeding movements vary (i.e., are flexible; sensu Wainwright et al., 2008) in response to the physical, textural and mechanical properties of the ingested food item in many vertebrates (e.g., Deban, 1997; Nemeth, 1997; Valdez and Nishikawa, 1997; Ferry-Graham, 1998; Dumont, 1999; Ferry-Graham et al., 2001; Vincent et al., 2006; Reed and Ross, 2010; Monroy and Nishikawa, 2011). In particular, such variability in the feeding movements has been documented extensively in squamate lizards during both the capture and the intra-oral transport and processing of food (e.g., Bels and Baltus, 1988; Herrel et al., 1996; Herrel et al., 1999; Smith et al., 1999; Schaerlaeken et al., 2007; Schaerlaeken et al., 2008; Sherbrooke and Schwenk, 2008; Metzger, 2009; Montuelle et al., 2010; Schaerlaeken et al., 2011).

Organisms that feed on a particular food item (i.e., dietary specialists) face a specific set of physical, mechanical and textural properties. Consequently, in such organisms, the form and function as well as the behavioral capabilities of the feeding system are known to be specialized for handling the particular characteristics of their diet (e.g., Herrel et al., 1997; Ralston and Wainwright, 1997; Korzoun et al. 2001, 2003; Aguirre et al., 2003; Homberger, 2003; Meyers and Herrel, 2005; Herrel and De Vree, 2009). In contrast, organisms that typically feed on a wide variety of food items (i.e., dietary generalists) routinely face variability in food properties. Thus, in dietary generalists such as omnivorous predators, flexibility of feeding movements is a key aspect of feeding behavior (e.g., Liem, 1978; Herrel et al., 1999). Flexibility is defined as the 'ability of an

organism to alter its behavior' in response to changes in the applied stimulus (i.e., 'across experimental treatments' in functional and behavioral studies; sensu Wainwright et al., 2008). From a neurological perspective, flexibility is based on the ability to modulate the motor pattern dictating movements (e.g., Deban et al., 2001). Here, because we will use kinematic data, our study will focus on the flexibility of the movements involved during prey capture; complementary electromyographic data are required to understand the modulation of the neuromotor control of prey capture. To date, flexibility of the feeding movements involved during prey capture has been documented in response to changes in prey size (e.g., Deban, 1997; Ferry-Graham, 1998; Delheusy and Bels, 1999; Vincent et al., 2006; Freeman and Lemen, 2007; Schaerlaeken et al., 2007) and prey mobility (e.g., Ferry-Graham, 1998; Ferry-Graham et al., 2001; Montuelle et al., 2010; Monroy and Nishikawa, 2011) in a wide array of vertebrates.

Recently, prey capture behavior has been demonstrated to not be solely based on the movements of the feeding elements (e.g., the jaws, the hyolingual apparatus), but rather to involve the integration of the feeding and locomotor elements (e.g., Higham, 2007ab; Montuelle et al., 2009a; Kane and Higham, 2011; Montuelle et al., 2012). Integration is defined as the coordination of the movements of two or more body parts (Wainwright et al., 2008). It is thought to be based on a complex motor control which ensure that their respective movements are coordinated in time (e.g., synchronized) and space (i.e., position; Wainwright et al., 2008). Locomotor-feeding integration has been observed in fishes with the movements of the jaw and hyoid (e.g., jaw opening, expansion of the buccal cavity through the ventral depression of the hyoid) being coordinated with those of the fins (Rice and Westneat, 2005; Higham, 2007a). In terrestrial tetrapods, although fewer data are available, locomotor-feeding integration has been demonstrated in snakes (e.g., Frazzetta, 1966; Janoo and Gasc, 1992; Kardong and Bels, 1998; Cundall and Deufel, 1999; Alfaro, 2003; Young, 2010; Herrel et al., 2011), and lizards (Montuelle et al., 2009a; Montuelle et al., 2012). Interestingly, in one omnivorous lizard, *Gerrhosaurus major*, both the feeding and locomotor movements are observed to be flexible in response to prey size and mobility (Montuelle et al., 2010). However, flexibility

in locomotor-feeding integration in response to prey properties itself has yet to be investigated. To know whether integrated movements can be flexible is thus of interest for our understanding of the mechanisms that drive complex behaviors like feeding.

Similar to some other cordyliform lizards, the prey capture behavior in *G. major* is characterized by a switch between tongue prehension and jaw prehension depending on prey type (Urbani and Bels, 1995; Smith et al., 1999; Reilly and McBrayer, 2007; Montuelle et al., 2009a). From a motor control perspective, each prey prehension mode stems from two different integrative motor patterns that coordinate feeding movements (i.e., tongue and jaw movements) with those of the locomotor elements (e.g., neck and forelimb movements; Montuelle et al., 2009a). Therefore, in *G. major*, flexibility in locomotor-feeding integration allows the use of two different prey prehension modes, each being used for capturing prey of different size: jaw prehension is used to capture large, whereas tongue prehension is used for relatively small prey (Montuelle et al., 2009a). Thus, flexibility in locomotor-feeding integration in response to prey properties may be a key adaptation for animals with an omnivorous diet.

Here we examine flexibility in locomotor-feeding integration in organisms that only use a single prey prehension mode. Varanid lizards were chosen because they are omnivorous predators that use jaw prehension for catching different types of prey (Schwenk, 2000; Vitt et al., 2003; Vitt and Pianka, 2005; Montuelle et al., 2012). Because the success of jaw prehension lies in the positioning of the skull on the prey, the movements of the anterior elements of the locomotor system (the forelimbs and the cervical region of the vertebral column) are expected to be coordinated with jaw movements, and locomotor-feeding integration is thus likely a key functional component of jaw prehension (Montuelle et al., 2012). Our hypothesis is that because jaw prehension is utilized successfully and efficiently to capture different prey types, locomotor-feeding integration may be flexible to respond to changes in prey properties. Alternatively, locomotor-feeding integration during jaw prehension may be found inflexible in response to variability in prey properties, suggesting that the motor control of locomotor-feeding integration may be independent from dietary constraints.

Our primary objective is to compare the jaw-neck-forelimb coordination patterns associated with the capture of prey varying in two properties: size and mobility; the effects of these two properties on feeding movements being well documented in lizards (e.g., Bels and Baltus, 1988; Herrel et al., 1996; Delheusy and Bels, 1999; Herrel et al., 1999; Schaerlaeken et al., 2007; Schaerlaeken et al., 2008; Metzger, 2009; Montuelle et al., 2009b; Montuelle et al., 2010; Schaerlaeken et al., 2011). Regarding prey size (here represented by prey length), we expect that the larger the prey, the higher the cranio-cervical system will rise. Consequently, we expect the capture of large prey to be characterized by wider gape to accommodate the size of the prey item that is to be ingested, and higher neck elevation, coupled with greater extension of the forelimbs, to lift the cranio-cervical system of the predator above the prey. In contrast, the capture of small prey is expected to be characterized by small maximum gape, as well as a reduced elevation of the neck (i.e., the neck will remain close to its rest position) and the flexion of the forelimbs so that the head drops down to the ground to pick up the prey.

Regarding prey mobility, we hypothesize that the quicker the prey, the quicker the predator will strike. Thus we expect jaw movements to be quicker when feeding on evasive prey; e.g., jaw opening to occur late and maximum gape angle to occur just before or at the same time as predator-prey contact. Additionally, we predict that maximum gape will be greater for the capture of evasive prey. Indeed, evasive prey change positioning in space constantly and in an unpredictable manner, therefore wider jaw opening is necessary to encompass the range of potential prey positioning during the strike. Based on recent data on prey capture in lizards (Montuelle et al., 2012), quick strikes are based on a jaw-neck coordination pattern that support a lunge onto the prey, that is to say we expect maximum neck elevation to occur just before or at the same time as jaw opening (i.e., at the start of the strike), and the neck subsequently lowers as the predator lunges on its prey. In contrast, the capture of immobile prey may not need a quick strike, thus we expect maximum neck elevation to occur later in the jaw opening phase, i.e., closer to maximum gape and predator-prey contact. Alternatively, because a quick strike is not required, feeding on immobile prey may not require the precise

coordination of jaw movements with those of the neck and forelimbs, and one might thus expect variability in the timing of neck elevation and forelimb flexion-extension with respect to jaw opening. Finally, we expect the forelimbs to support the strike by extending during the jaw opening to thrust the head forward onto the evasive prey. For the capture of immobile prey, the extension of the forelimb may not be as great as it merely support the elevation of the cranio-cervical system.

## MATERIAL AND METHODS

### *Animal husbandry*

Two adult individuals of *Varanus ornatus* and one adult individual of *V. niloticus* (snout-vent length =  $480 \pm 11$  mm) were purchased from a commercial animal dealer. *V. niloticus* and *V. ornatus* are closely related (Böhme, 2003) and used to be considered different subspecies (e.g. Luiselli, Akani & Capizzi, 1999). Because their feeding morphology and behavior are similar, individuals of both species are grouped in the analysis. They were maintained individually in large vivaria (1.5m long x 1.5m deep x 30cm high). Light was set on a 12h:12h light/dark cycle. Temperature was set at 24-30°C during the day with a basking spot at higher temperature, and no lower than 24°C during the night. Water was available *ad libitum* and the lizards were fed mice and grasshoppers twice a week.

### *Experimental set-up*

A trackway (420 x 60 cm) covered with non-slip green plastic flooring was used for the experiments. At one end, a wooden box (60 x 60 x 60 cm) with a sliding door provided the animal with a place to rest between trials. A heating lamp provided a basking spot in front of the box. At the other end, a plexiglas box (60 x 60 x 60 cm) was covered by the cameras. Each individual was maintained during 1 week, during which recording sessions were organized daily. After enough data were recorded for one individual, the second individual was brought in for 1 week and submitted to daily recording sessions. Similarly for the third individual. The trackway was cleaned between trials. At the beginning of each recording session, the individual was allow to walk along the trackway to get familiarized with the experimental set-up. Between trials, the individual



was kept in the wooden box with the door shut. During trials, the prey item was placed in the area covered by the cameras. All prey items were oriented with their long axis perpendicular to the long axis of the predator's head. For mobile prey, as their orientation varied during the approach of the predator, only strikes on perpendicularly oriented prey were analyzed. The door of the box was subsequently opened and we then waited for the animal to spontaneously initiate foraging along the trackway and strike on the prey item.

Prey capture was recorded at 200 frames per second using four synchronized high-speed cameras (Prosilica GE680, Allied Vision Technologies GmbH, Stadtroda, Germany). Two cameras were set up in dorsal view filming through the Plexiglas sheet above the trackway (Figure 1). One camera was set up in oblique frontal view, filming through the Plexiglas sheet placed at the end of the trackway. The fourth camera was installed in lateral view. By doing so, the anatomical points of interest were visible in at least three of the four views during the whole sequence recorded. Cameras were calibrated and scaled using a DLT routine based on the digitization of a black-and-white checkerboard composed of ten by ten 1cm x 1cm squares.

### *Data set*

Four prey types were offered during the recording session: grasshoppers (*Locusta migratoria*, 44±1 mm), live newborn mice (*Mus musculus*, 39±1 mm), adult mice (*M. musculus*, 90±1 mm) and dead adult mice (*M. musculus*, 87±3 mm). The length of every prey item was measured using a pair of calipers before being offered. To quantify prey mobility, the maximum speed of the prey during the approach of the predator was extracted from the displacement of the prey point over time. These four prey types were chosen as they represent different length and mobility (Figure 1). Grasshoppers are small and evasive prey, newborn mice are small prey with reduced mobility, adult mice are large and mobile prey, and dead adult mice are large and immobile prey. This allows us to assess the effect of prey length in mobile (grasshoppers *versus* adult mice) and immobile prey (newborn mice *versus* dead adult mice), and the effect of mobility in



two length categories (small prey: grasshoppers *versus* newborn mice; large prey: adult mice *versus* dead adult mice).

Twenty sequences representing the successful capture of grasshoppers were analyzed (eight, seven and five sequences for each individual, respectively; Figure 2A), seven sequences for newborn mice (four and three sequences for the two *V. ornatus* individuals only; Figure 2B), twelve sequences for adult mice (five, four and three for each individual, respectively; Figure 2C), and nine sequences for dead adult mice (three for each individual; Figure 2D). Note that, during the recording sessions, prey types were offered in random order to avoid learning effects.

### *Kinematic analysis*

Seven markers were painted on the body: the tip of the lower and upper jaws, the corner of the mouth, on a point halfway between the occipital and the pectoral girdle, and on the shoulder, the elbow and the wrist joints (Figure 1). These markers were digitized on each frame for each camera view. Screen coordinates of the digitized markers were extracted on each of the four camera views and their position in 3 dimensions over time was calculated using the calibration. The position of the prey (point at the insertion of the head on the prothorax or the trunk) and the position of the eye of the predator were also digitized to quantify movements of the predator relative to the prey during the strike. Quantifying movements of skeletal elements based on external markers must be performed carefully because of the movements of the skin, but here we believe that potential error is reduced because of the small amount of soft tissue between the skin and the actual skeletal elements of interest. This should be acknowledged as a limitation in our study. Additionally, although we acknowledge that the hind limbs are important for propulsion during the lunge, our study focuses on the movements of the forelimbs and the cervical portion of the vertebral column because the requirements for sufficient resolution in reconstructing movements in 3 dimensions based on a multiple-camera set up constrained the field of view.

Three kinematic profiles were constructed and variables were extracted to quantify movements of the jaws, neck and forelimbs. In these profiles, time was set at  $t = 0$  at the instant of predator-prey contact so that events occurring before contact are characterized by negative time value, and events occurring after are characterized by positive values. First, gape angle was calculated between the tip of the upper jaw, the corner of the mouth and the tip of the lower jaw (Figure 3A). From this profile, we extracted the time of the start of jaw opening, the time of maximum gape angle, and the amplitude of maximum gape angle (Table 1). Second, neck elevation was calculated as the difference in Z-coordinate of the point on the neck with respect to its position at rest (Figure 3B). Maximum neck elevation, and the time to maximum neck elevation were extracted (Table 1). Variation of neck height between the instant of jaw opening and the instant of predator-prey contact was also calculated, with negative values representing the neck being lowered during the strike and positive values representing neck elevation. Finally, elbow angle was calculated between the shoulder point, the elbow point and the wrist point (Figure 3C). From this profile, four variables were extracted: maximum elbow angle (representing maximum extension of the forelimb at the elbow joint), minimum elbow angle (representing maximum flexion of the forelimb at the elbow joint), and their respective timing (Table 1). Variation of elbow flexion between the instant of jaw opening and the instant of predator-prey contact was also calculated, with negative values indicating the forelimb flexing during the strike and positive values indicating forelimb extension.

Additionally, the distance between the predator and the prey was calculated as the difference in position between the predator's eye and the position of the prey. From this, we extracted the predator-prey distance at the onset of jaw opening to quantify how far from the prey the predator initiates the strike (Table 1). Finally, based on the displacement of the eye of the predator over time, we calculated the speed of the head during the strike, and extracted maximum skull velocity (Table 1).

To **estimate integration among** jaw-neck-forelimb movements at the functional level, we calculated the latency of maximum neck elevation, of maximum forelimb extension and

of maximum forelimb flexion with respect to jaw opening. Latency was defined as the difference between the time of occurrence of one event of interest (i.e., maximum neck elevation, minimum and maximum elbow angle) and the time to jaw opening (Figure 4). A latency value close to 0 represents a movement being synchronized with jaw opening (Figure 4A). A negative latency value represents a movement occurring before the start of jaw opening (Figure 4B), whereas a positive value represents a movement occurring after jaw opening (Figure 4C).

### *Statistical analysis*

Normality was verified using histograms of frequency of observations and Shapiro-Wilk's tests for each variable. First, analyses of variance coupled to univariate *F*-tests considering the effects of prey type (fixed factor) and individuals (random factor), and the corresponding interaction effects, were performed on the speed of the skull during the strike, as well as on the predator-prey distance at the onset of jaw opening to identify significant differences in the characteristics of the strike itself. Note that non-significant interaction effects were removed from the final design of the ANOVA's. Bonferroni post-hoc tests were used to test differences among the four prey types tested, and among the three individuals.

Factor analyses were performed on jaw variables, neck variables, and forelimb variables separately to reduce the dimensionality of the data set. Multivariate factors with eigenvalues greater than 1 were retained for the rest of the analysis. Jaw factors, neck factors and forelimb factors were submitted to ANOVA's coupled to univariate *F*-tests with prey type entered as a fixed factor, and individual as a random factor. Non-significant interaction terms were removed from the final model, and Bonferroni post-hoc tests were used to test differences among the four prey types tested. To determine the pattern of coordination between jaw, neck and forelimb movements, the bivariate correlations between the jaw factors with the neck factors and with the forelimb factors were tested for each prey type separately. To assess the flexibility of the jaw-neck-forelimb coordination pattern in response to prey types, the characteristics of the significant correlations (i.e., the Pearson's coefficient *r*, the slope, and the intercept)

were compared between prey types. The Pearson's correlation coefficients were compared between prey types using Fisher's z-test (Fisher, 1921), whereas the slopes and the intercepts were compared using Student's *t*-tests.

To investigate flexibility of jaw-neck-forelimb synchronization, the latency of neck elevation, of forelimb flexion and of forelimb extension with respect to jaw opening were submitted to ANOVA's coupled to univariate *F*-tests. Prey type was entered as a fixed factor and individuals as a random factor, and non-significant interaction terms were removed from the final model. Bonferroni post-hoc tests were performed on the prey type factor to test which prey type differs from the others. To quantify the extent to which synchronization between jaws and neck movements is altered in response to prey size, bivariate correlations between the latency of neck elevation with respect to jaw opening and prey size was tested for each of the four prey types separately. Similarly, bivariate correlations between the latency of neck elevation with respect to jaw opening and the maximum velocity of the prey during the predator's approach was tested for mobile prey (i.e., grasshoppers and mice) to determine the effect of prey mobility on jaw-neck synchronization. Latency of forelimb flexion and of forelimb extension were submitted to the same procedure. The characteristics of the significant correlations were compared between prey types: the Pearson's correlation coefficients using Fisher's z-test (Fisher, 1921), the slopes and the intercepts using Student's *t*-tests.

## RESULTS

### *Prey capture behavior in varanid lizards*

Similarly to other varanid lizards, the tongue of *Varanus ornatus* and *V. niloticus* make use of extensive tongue-flicking while approaching prey, suggesting that chemoreception is used to detect and locate different prey items (in accordance with Cooper, 1989; Kaufman et al., 1996; Cooper and Habegger, 2001). Typically, *V. ornatus* and *V. niloticus* stops between 7 and 12 cm away from the prey (see Table 1), then the jaws open and the strike is initiated (see Montuelle et al., 2012). As expected, jaw prehension was always used during prey capture (in accordance with Schwenk, 2000;

Vitt et al., 2003; Vitt and Pianka, 2005; Montuelle et al., 2012). For both types of evasive prey, the successful/missed trials ratio was greater than 50%: 30 successful captures of live grasshoppers out of the 51 sequences observed (63.8% of success), 11 successful captures of adult mice out of the 16 sequences observed (68.8% of success); no missed trial was observed when feeding on immobile prey (i.e., newborn mice and dead adult mice).

The strike consists of a lunge on the prey with the jaws opened. Maximum gape occurs shortly before predator-prey contact (Figure 3A), suggesting that jaw closing is initiated without any sensory feedback from the prey. The lunge on the prey is characterized by the neck height dropping down during the strike, but the neck movements involved during prey capture vary between the prey types investigated here (Figure 3B). The neck remains high above its resting position all along the strike when feeding on large prey items (adult mice; Figures 2C and 3B), whereas the neck is lowered further down to bring the skull closer to the ground so that the jaws can pick up small prey items such as grasshoppers and newborn mice (Figures 2BD and 3B). Similarly, the forelimb angular configuration at the elbow joint is different between prey types (Figure 3C). During the capture of dead adult mice, the forelimb extends continuously while the jaws open (Figures 2D and 3C). In contrast, the forelimb flexes during jaw opening when feeding on adult mice (Figures 2C and 3C). Forelimb flexion also occurs early in the strike on grasshoppers, but the forelimb extends quickly during jaw opening (Figures 2A and 3C). Finally, forelimb movements are limited during the capture of small motionless prey like newborn mice (Figures 2B and 3C).

#### *Variability in strike in response to prey types*

Maximum velocity of the head during the strike is also significantly different among prey types ( $F_{3,42} = 13.339$ ,  $P < 0.001$ ; see Table 1). Post-hoc tests demonstrate that strikes on grasshoppers are significantly quicker than on newborn mice ( $P = 0.006$ ) and dead adult mice ( $P < 0.001$ ). Strikes on live adult mice are also significantly quicker than on newborn mice ( $P = 0.021$ ) and dead adult mice ( $P < 0.001$ ). These results show that strikes are faster when feeding on evasive prey. Head velocity is different among

individuals ( $F_{2,42} = 15.800$ ,  $P < 0.001$ ), indicating that the strikes of both individuals of *V. ornatus* are quicker than those of the one individual of *V. niloticus* ( $P < 0.001$  for both post-hoc tests between individuals). Prey type x individual interaction effects are not significant.

Predator-prey distance at the onset of jaw opening is significantly different among the four prey types ( $F_{3,42} = 7.264$ ,  $P < 0.001$ ), and post-hoc tests reveal that jaw opening is initiated while being further away from the prey when striking on grasshoppers (see Figure 2A, Table 1) than when striking on newborn mice ( $P = 0.013$ ; Figure 2B, Table 1), adult mice ( $P = 0.036$ ; Figure 2C, Table 1) or dead adult mice ( $P = 0.027$ ; Figure 2D, Table 1). This suggests that varanids stop further away from the prey when preparing a strike on small evasive prey like grasshoppers, likely to avoid eliciting anti-predator behavior from the prey. Significant individual differences are also observed in the predator-prey distance at the onset of jaw-opening ( $F_{2,42} = 12.108$ ,  $P < 0.001$ ), with post-hoc tests indicating that the one individual of *V. niloticus* moves closer to the prey before initiating a strike compared to the two individuals of *V. ornatus* ( $P < 0.001$  and  $P = 0.004$ , respectively). Prey type x individual interaction effects are not significant.

#### *Variability in jaw, neck, and forelimb movements in response to prey types*

One multivariate factor was defined by the factor analysis, representing 50.9% of the variance of jaw kinematics. The jaw factor is correlated with time to jaw opening and maximum gape angle (Table 2A). In the analysis of variance of the jaw factor, prey type x individual interaction term is significant indicating individuals respond differently to changes in prey type. Prey type effect is significant for each individual respectively ( $F_{3,16} = 8.546$ ,  $P = 0.001$ ;  $F_{3,13} = 14.481$ ,  $P < 0.001$ ;  $F_{2,8} = 4.921$ ,  $P = 0.04$ ); see Table 3 for the individual results of the post-hoc tests.

Two multivariate factors represent 71.8 % of the total variance of the kinematics associated with neck elevation. Neck factor 1 represents 37.7% of the total variance and is correlated with maximum neck elevation (positively) and variation in neck height during the strike (negatively; Table 2B). An analysis of variance reveals that prey type

effects are significant on neck factor 1 ( $F_{3,42} = 5.285$ ,  $P = 0.003$ ) with neck lowering when striking on grasshoppers whereas it is kept at rest position during the capture of dead mice ( $P = 0.001$ ; Figure 5A; Table 1). Individual differences are also significant ( $F_{2,42} = 33.841$ ,  $P < 0.001$ ) revealing that the neck of both individuals of *V. ornatus* elevates higher than in the one individual of *V. niloticus*. Neck factor 2 represents 34.1% of the total variance and is correlated with the time to maximum elevation of the neck (Table 2B). No prey type or individual effects are found on neck factor 2.

Two multivariate factors represent 85.1% of the total variance of the kinematics describing forelimb movements at the elbow joint. Elbow factor 1 represents 48.3% and is correlated positively with variation of elbow angle during the strike and the time to maximum elbow angle, and negatively with the time to minimum elbow angle (Table 2C). Prey type effects approach significance on elbow factor 1 ( $F_{3,42} = 2.769$ ,  $P = 0.053$ ; Figure 5B), but individual effects are not. Elbow factor 2 represents 36.8% and is correlated with minimum and maximum elbow angle (Table 2C). The Prey type x individual interaction term is significant on elbow factor 2, so prey type effects were tested for each individual separately. Prey type effects are significant in the two *V. ornatus* individuals ( $F_{3,16} = 9.675$ ,  $P = 0.001$ ;  $F_{3,16} = 5.124$ ,  $P = 0.015$ ; respectively), but not in the *V. niloticus* individual. Specifically, in both individuals of *V. ornatus*, the elbow joint is more extended during the capture of mice than during the capture of grasshoppers (Table 3).

#### *Variability in jaw-neck-forelimb integration in response to prey types*

To investigate jaw-neck-forelimb integration, correlations between the jaw factor and the neck and elbow factors are tested for each prey types separately. No correlations are significant during the capture of newborn mice and of dead adult mice. In contrast, the jaw factor is positively correlated with neck factor 2 during the capture of grasshoppers and adult mice ( $r = 0.639$ ,  $P = 0.002$ ;  $r = 0.658$ ;  $P = 0.02$ , respectively; Figure 6A) illustrating the integration of jaw opening with neck elevation during the capture of evasive prey. This shows that during the capture of grasshoppers and adult mice, the later and wider the jaws open (i.e., closer to predator-prey contact; Figures 2A and 2C)



the later maximum elevation of the neck occurs (i.e., closer to predator-prey contact), showing that jaw movements and neck movements are delayed concomitantly during the capture of evasive prey, demonstrating their integration. Capture of adult mice is also characterized by the correlation of the jaw factor with neck factor 1 ( $r = 0.754$ ,  $P = 0.005$ ; Figure 6B) as well as with elbow factor 2 ( $r = 0.599$ ,  $P = 0.040$ ; Figure 6C), indicating that the later and wider the jaws open the higher the neck rises and the greater the extension of the forelimb at the elbow joint is.

To investigate flexibility in jaw-neck-forelimb integration, we compare the correlation coefficients between prey types. Only the correlation between the jaw factor and neck factor 2 is common to the capture of two different prey types (i.e., grasshoppers and adult mice; Figure 6A). The Pearson's correlation coefficients are not significantly different ( $z = -0.080$ ,  $P = 0.468$ ), and the slope of the correlation is not significantly different either ( $t = -0.409$ ,  $P = 0.343$ ). However, the intercept differs between the capture of grasshoppers and adult mice ( $t = -2.347$ ,  $P = 0.013$ ), showing that maximum neck elevation is achieved closer to predator-prey contact during the capture of larger prey (i.e., adult mice) so that the head is raised over the prey item. This indicates that the jaw-neck integration pattern characterizing evasive prey is flexible in response to prey length.

#### *Variability in the synchronization of jaw, neck and forelimb movements in response to prey properties*

Synchronization of neck and forelimb movements with jaw opening is also altered in response to prey type (Figure 7). The analysis of variance performed on the latency of neck elevation with respect to jaw opening reveals that prey type effects are significant ( $F_{3,42} = 4.121$ ,  $P = 0.012$ ), with maximum neck elevation occurring significantly later in the jaw opening phase during the capture of dead mice (Figures 2D, 4C and 7D; Table 1) than during the capture of newborn mice (post-hoc test  $P = 0.008$ ; Figures 2B, 4B and 7B; Table 1) and grasshoppers (post-hoc test  $P = 0.017$ ; Figures 2A, 4A and 7A; Table 1). This indicates that maximum neck elevation is synchronized with the instant of jaw opening during the capture of small prey, whereas it is delayed in the jaw opening

phase during the capture of large immobile prey. Latency of maximum elbow angle is also affected by prey type ( $F_{3,42} = 4.045$ ,  $P = 0.013$ ). Forelimb extension at the elbow joint is achieved later in the jaw opening phase (i.e., closer to predator-prey contact) during the capture of dead mice (Figures 2D, 4C and 7D) than during the capture of newborn mice (post-hoc test  $P = 0.009$ ; Figures 2B, 4A and 7B) and adult mice (post-hoc test  $P = 0.031$ ; Figures 2C, 4A and 7C). This reveals that maximum extension of the forelimb at the elbow joint is synchronized with the instant of jaw opening for the capture of newborn and adult mice whereas it is synchronized with maximum gape for the capture of dead adult mice. No effects of prey type are found significant on the latency of minimum elbow angle. Finally, there are no significant individual differences in the latency of neck elevation or on the latency of minimum and maximum elbow angle.

The effects of prey length and prey mobility on the latency of neck and forelimb movements with respect to jaw opening were analyzed for each prey type separately. Prey length has no effect on the latency of neck elevation, the latency of minimum elbow angle or the latency of maximum angle in any of the four prey types tested in our analysis. In contrast, prey mobility, described by the maximum velocity of the prey during the approach of the predator, is correlated with the latency of minimum elbow angle in grasshoppers and adult mice ( $r = 0.512$ ,  $P = 0.021$ , and  $r = 0.600$ ,  $P = 0.039$ , respectively; Figure 8A). This shows that forelimb flexion is delayed closer to maximum gape and predator-prey contact for the capture of quick prey (see Figure 4C). This late flexion of the forelimb may be used to counter the inertia created by the body during the strike, reducing the speed of the head as predator-prey contact approaches. The Pearson's correlation coefficients associated with each correlation are significantly similar ( $z = -0.312$ ,  $P = 0.378$ ), as well as their intercepts ( $t = -0.915$ ,  $P = 0.184$ ). However, the difference between the slopes of the correlation associated with each prey approaches significance ( $t = -1.640$ ,  $P = 0.056$ ), suggesting that the latency of elbow flexion is more sensitive to changes in prey velocity in adult mice than in grasshoppers (Figure 8A). This shows that the effects of prey mobility on jaw-forelimb coordination are altered in response to the length of the prey. The maximum velocity of grasshoppers is also correlated with latency of maximum elbow angle ( $r = -0.482$ ,  $P = 0.032$ ; Figure 8B),

indicating that the capture of small and quick prey is characterized by the earlier extension of the forelimb at the elbow joint.

## DISCUSSION

In accordance with our predictions, our data show that varanid lizards use a specific jaw-neck coordination pattern for the capture of different prey items that vary in length and mobility (Figures 3 and 7). Strikes on grasshoppers (small evasive prey) have more in common with the strikes on live adult mice (large evasive prey) than with the strikes of newborn mice (motionless prey of similar size), suggesting that the effects of prey mobility overcome those of prey size. Indeed, additionally to the fact that strikes on grasshoppers and live adult mice are quick strikes (Table 1), strikes on all sizes of evasive prey are similar in that they are characterized by a strong link between jaw movements and neck elevation: if one is delayed, then the other is delayed concomitantly (Figure 6A). The capture of grasshoppers is significantly quicker and initiated further away from the prey, likely to avoid eliciting anti-predator response (Table 1). The neck rises above its rest position to reach its maximum elevation before jaw opening (Figures 3B and 7A), and lowers quickly after jaw opening as the predator lunges forward (Figures 2A and 3B). Finally, forelimbs flex and then quickly extend during the strike, like a spring, likely contributing to the lunge by thrusting the cranio-cervical complex forward towards the prey (Figures 2A, 3C and 7A). During the strike on live adult mice, the neck rises similarly to the strikes on grasshoppers but do not lower as much as during the strike on small prey (immobile or evasive ones; Figure 3B). Flexion of the forelimbs is also observed during the strikes on live adult mice, although it is not followed by a quick extension (Figures 3C and 7C). In this case, forelimb flexion is suggested to contribute in the immobilization of large evasive prey by pinning the prey on the ground, limiting the potential for prey escape after the strike.

To capture small motionless prey like newborn mice, the strike is different in that it is initiated close to the prey. The strike on newborn mice consists of the neck rising, supported by the extension of the forelimb at the elbow joint (Figure 3BC and 7B). During the jaw opening phase, the neck lowers and the forelimbs flex to drop the head

of the predator down to the ground to pick up the prey item (Figures 2B, 3BC and 7B). The strike on dead adult mice is the most singular among the strike strategies observed here. Strikes on large immobile prey are the slowest and are initiated close to the position of the prey (Table 1). Neck rises slightly during jaw opening, remaining close to its rest position, with its maximum elevation being achieved late in the jaw opening phase. This indicates that neck elevation is always initiated before jaw opening (Figures 3B and 7ABC), but that its duration is extended for the capture of large immobile prey to allow the positioning of the head above the prey item. Finally, forelimbs extend slowly during the strike on dead adult mice in order to bring the head of the predator above and forward towards the prey item.

Within this repertoire of strike strategies, the jaw-neck-forelimb coordination pattern is demonstrated to be flexible in response to prey properties. Between the two prey properties tested here, prey mobility appears to be a defining parameter, over the size of the prey for instance, in dictating what coordination pattern shall be used. On one hand, predator-prey distance at which the predator stops before initiating the strike (i.e., before opening the jaws) is greater for both types of evasive prey than for any type of immobile prey (see Table 1). This indicates that varanid lizards are able to make the difference between evasive and immobile prey during the approach, and choose the appropriate strike strategy accordingly: stop far away and trigger a quick strike if targeting an evasive prey, keep approaching closer to the target as long as no movement is displayed (Figure 9). This demonstrates how prey mobility is key information for the success of prey capture behavior in varanid lizards. By extension, it illustrates the importance of sensory feedback from visual cues and chemoreception during the approach of varanid lizards in order to assess the risk of prey escape (Cooper, 1989; Garrett et al., 1996; Kaufman et al., 1996; Cooper and Habegger, 2001; Chiszar et al., 2009; Gaalema, 2011).

On the other hand, our data demonstrate how flexibility of jaw-neck-forelimb integration is an important component of the capture of evasive prey in varanid lizards (Figures 6 and 8). Indeed, consistent jaw-neck integration patterns are observed during the

capture of both types of evasive prey (Figure 6A). However, despite the consistency of such integration pattern (i.e., statistically similar slope of bivariate correlations across experimental treatments), prey length affects jaw-neck integration as the neck is raised higher during the capture of large evasive prey. Such variability in the jaw-neck integration pattern indicates that the jaw-neck integration pattern characterizing the capture of evasive prey is flexible in response to prey size (here represented by the length of the prey item). This shows that prey-capture behavior in omnivorous predators, like varanid lizards, is not only based on the sole flexibility of feeding movements, but rather involves the flexibility of the integration pattern coupling the feeding and locomotor movements. This suggests that the motor control responsible for the integration of multiple structures across different anatomical systems might be modulated, although the neurological dimension of such hypothesis remains to be investigated.

Furthermore, our results show that jaw-forelimb integration is flexible in response to the maximum velocity of the prey during the approach of the predator (i.e., prior to the strike; Figure 8A). When striking on very active prey, varanids alter the jaw-forelimb coordination pattern so that forelimb flexion is delayed in the jaw opening phase (i.e., closer to maximum gape; Figure 8A). Because the jaw-forelimb integration pattern is different during the capture of grasshoppers and adult mice (Figures 7AC), such flexibility in response to prey velocity yields different behavioral outputs. During the capture of adult mice, the late flexion of the forelimb at the elbow joint illustrates how forelimb flexion is delayed to occur closer to predator-prey contact (Figure 8A), supporting our hypothesis that forelimb flexion plays a role in securing the prey after the strike. During the capture of grasshoppers, forelimb flexion occurs before the extension of the forelimb that thrusts the head of the predator forward onto the prey. Consequently, the delay of the flexion (Figure 8A) coupled with the early extension (Figure 8B) of the forelimb at the elbow joint reveals a quicker extension that is proposed to enhance head velocity during the strike.

Jaw-neck-forelimb integration during prey capture in varanid lizards is flexible in response to both the mobility and the size of evasive prey, suggesting that the motor control responsible for the coordination of jaw, neck and forelimb movements can be modulated. Indeed, our data demonstrate that different jaw-neck-forelimb coordination patterns are used during the capture of small *versus* large prey (Figures 6A, 7 and 8A). First, because prey length is constant throughout the feeding sequence, varanids are likely able to assess the length of the prey while approaching it and select a particular jaw-neck-forelimb integration pattern before the strike (i.e., feed-forward modulation). Most importantly, jaw-neck forelimb coordination appears to be an essential characteristic of the capture of evasive prey (Figures 6, 8 and 9). Consequently, varanids **first** assess the mobility of the target prey (i.e. the escape risk; see Gaalema, 2011), **followed by an assessment of its size (Figure 9)**. Given that prey mobility is a parameter that cannot be anticipated during a single prey capture trial, varanids may rely on sensory-driven feedback modulation to adjust the jaw-neck-forelimb integration pattern in response to changes in prey velocity. Investigation of the neuronal pathways responsible for the sensory control of locomotor-feeding integration is a promising research direction for our understanding of feeding behavior in vertebrates.

Previously, the functional consequences of an omnivorous diet have been mainly documented as the flexibility in the movements of the feeding structures (i.e., the jaws, the tongue, the hyobranchial apparatus; e.g., Liem, 1978; Herrel et al., 1999). Even though flexibility in the movements of locomotor structures like the forelimbs and the vertebral column (at least in the cervical region) has also been reported in an omnivorous lizard (*Gerrhosaurus major*; Montuelle et al., 2010), our data indicate that flexibility in locomotor-feeding integration may be a key component in the ability to feed on prey items that vary in their physical and mechanical properties, especially mobility (Figure 9). This finding may be critical to understanding dietary specialization. Indeed, by feeding routinely on the same food, selective pressures are imposed on the feeding structures to optimize prey capture efficiency (e.g., Herrel et al., 1997; Ralston and Wainwright, 1997; Aguirre et al., 2003; Meyers and Herrel, 2005; Herrel and De Vree, 2009). As changes in food properties are shown here to affect locomotor-feeding

integration in lizards using jaw prehension, particular food properties are suggested to require particular locomotor-feeding integration patterns (see Figure 9), and specialization in locomotor-feeding integration may occur in response to diet. Varanid lizards are specialized for feeding on 'hard to catch' prey (Losos and Greene, 1988). Given the strong effects of prey mobility on jaw-neck-forelimb coordination (see Figures 6 and 8), flexibility of locomotor-feeding integration in response to prey mobility is proposed to be a key functional feature optimizing the capture of evasive prey, and hence may contribute to the dietary specialization of varanids. Our observations of the functional basis of jaw prehension indeed suggest that the selective pressures stemming from food properties may not be restricted to the feeding system only, but rather act at the whole-organism level, selecting for patterns of locomotor-feeding integration flexible enough to respond variation in prey mobility.

## ACKNOWLEDGMENTS

This work is part of the PhD project of S.J.M. while at the Muséum National d'Histoire Naturelle (MNHN) in Paris, France, which was supported by the Legs Prévost (MNHN), ANR 06-BLAN-0132-02 and Phymep Corporation. S.J.M. is now a postdoctoral associate at Ohio University Heritage College of Osteopathic Medicine (OU-HCOM) in Athens, OH, USA, supported by NSF grant MRI DBI-0922988. *We would like to thank two anonymous reviewers for their comments and suggestions on the first version of the manuscript.* We would also like to thank Susan H. Williams at OU-HCOM for her comments during the writing of the manuscript, and Donald B. Miles at Ohio University for his suggestions about data analysis. We also thank ANR project Kameleon (ARA 05-MMSA- 0002 'Masse de Données') which provided the opportunity to use the synchronized camera set-up at the Plateau Technique 'Biologie des Organismes' (dpt 'Ecologie et Gestion de la Biodiversité', MNHN) and Eric Pellé for his help with the animals.



## REFERENCES

- Aguirre, L. F., Herrel, A., Van Damme, R. and Matthysen, E.** (2003). The implications of food hardness for diet in bats. *Functional Ecology* **17**, 201-212.
- Alfaro, M. E.** (2003). Sweeping and striking: a kinematic study of the trunk during prey capture in three thamnophiine snakes. *Journal of Experimental Biology* **206**, 2381-2392.
- Baussart, S., Korsoun, L., Libourel, P-A and Bels, V. L.** (2009). Ballistic food transport in Toucans. *Journal of Experimental Zoology Part A-Ecological Genetics and Physiology* **311A**, 465-474.
- Baussart S. and Bels, V. L.** (2011). Tropical Hornbills (*Aceros cassidix*, *Aceros undulatus*, and *Buceros hydrocorax*) use ballistic transport to feed with their large beaks. *Journal of Experimental Zoology Part A-Ecological Genetics and Physiology* **315A**, 72-83.
- Bels, V. L. and Baltus, I.** (1988). The Influence of Food Items on the Feeding Cycle in Anolis-Equestris (Reptilia, Iguanidae). *Copeia*, 479-481.
- Bels, V. L.** (2003). Evaluating the complexity of the trophic system in Reptilia. In *Vertebrate biomechanics and evolution* (eds. V. L. Bels, J.-P. Gasc, A. Casinos), pp. 185-202. Oxford: BIOS Publishers.
- Bels V. L., Chardon M. and Kardong K.** (1994). Biomechanics of the hyolingual system in Squamata. In *Advances in Comparative and Environmental Physiology 18: Biomechanics of Feeding in Vertebrates* (eds. V. L. Bels, M. Chardon, P. Vandewalle), pp. 197-240. Berlin: Springer-Verlag.
- Chiszar, D., Krauss, S., Shipley, B., Trout, T. and Smith, H. M.** (2009). Response of Hatchling Komodo Dragons (*Varanus komodoensis*) at Denver Zoo to Visual and Chemical Cues Arising From Prey. *Zoo Biology* **28**, 29-34.
- Cooper, W. E.** (1989). Prey Odor Discrimination in the Varanoid Lizards *Heloderma-Suspectum* and *Varanus-Exanthematicus*. *Ethology* **81**, 250-258.
- Cooper, W. E. and Habegger, J. J.** (2001). Responses by juvenile savannah monitor lizards (*Varanus exanthematicus*) to chemical cues from animal prey, plants palatable to herbivores, and conspecifics. *Journal of Herpetology* **35**, 618-624.
- Cundall, D. and Deufel, A.** (1999). Striking patterns in Boid snakes. *Copeia* **1999**, 868-883.
- Deban, S. M.** (1997). Modulation of prey-capture behavior in the plethodontid salamander *Ensatina eschscholtzii*. *Journal of Experimental Biology* **200**, 1951-1964.
- Deban, S. M., O'Reilly, J. C. and Nishikawa, K. C.** (2001). The evolution of the motor control of feeding in amphibians. *American Zoologist* **41**, 1280-1298.
- Delheusy, V. and Bels, V. L.** (1999). Feeding kinematics of *Phelsuma madagascariensis* (Reptilia : Gekkonidae): Testing differences between *Iguania* and *Scleroglossa*. *Journal of Experimental Biology* **202**, 3715-3730.
- Dumont, E. R.** (1999). The effect of food hardness on feeding behaviour in frugivorous bats (Phyllostomidae): an experimental study. *Journal of Zoology* **248**, 219-229.
- Ferry-Graham, L. A.** (1998). Effects of prey size and mobility on prey-capture kinematics in leopard sharks *Triakis semifasciata*. *Journal of Experimental Biology* **201**, 2433-2444.
- Ferry-Graham, L. A., Bolnick, D. I. and Wainwright, P. C.** (2002). Using functional morphology to examine the ecology and evolution of specialization. *Integrative and Comparative Biology* **42**, 265-277.
- Ferry-Graham, L. A., Wainwright, P. C., Westneat, M. W. and Bellwood, D. R.** (2001). Modulation of prey capture kinematics in the cheeklined wrasse *Oxycheilinus digrammus* (Teleostei : labridae). *Journal of Experimental Zoology* **290**, 88-100.
- Fisher, R. A.** (1921). On the "probable error" of a coefficient of correlation deduced from a small sample size. *Metron* **1**, 3-32.

- 720 **Frazzetta, T. H.** (1966). Studies of the morphology and function of the skull in Boidae (Serpentes). Part II:  
721 Morphology and function of the jaw apparatus in *Python sebae* and *Python molurus*. *Journal of*  
722 *Morphology* **118**, 217-296.
- 723 **Freeman, P. W. and Lemen, C. A.** (2007). Using scissors to quantify hardness of insects: do bats select  
724 for size or hardness? *Journal of Zoology* **271**, 469-476.
- 725 **Gaalema, D. E.** (2011). Visual Discrimination and Reversal Learning in Rough-Necked Monitor Lizards  
726 (*Varanus rudicollis*). *Journal of Comparative Psychology* **125**, 246-249.
- 727 **Garrett, C. M., Boyer, D. M., Card, W. C., Roberts, D. T., Murphy, J. B. and Chiszar, D.** (1996).  
728 Comparison of chemosensory behavior and prey trail-following in the varanoid lizards *Varanus gouldii*  
729 and *Heloderma suspectum*. *Zoo Biology* **15**, 255-265.
- 730 **Griffen, B. D. and Mosblack, H.** (2011). Predicting diet and consumption rate differences between and  
731 within species using gut ecomorphology. *Journal of Animal Ecology* **80**, 854-863.
- 732 **Hampton, P. M.** (2011). Comparison of cranial form and function in association with diet in natricine  
733 snakes. *J Morphol* **272**, 1435-1443.
- 734 **Herrel, A. and De Vree, F.** (2009). Jaw and hyolingual muscle activity patterns and bite forces in the  
735 herbivorous lizard *Uromastix acanthinurus*. *Archives of Oral Biology* **54**, 772-782.
- 736 **Herrel, A., Cleuren, J. and DeVree, F.** (1996). Kinematics of feeding in the lizard *Agama stellio*. *Journal of*  
737 *Experimental Biology* **199**, 1727-1742.
- 738 **Herrel, A., Verstappen, M. and De Vree, F.** (1999). Modulatory complexity of the feeding repertoire in  
739 scincid lizards. *Journal of Comparative Physiology A-Neuroethology Sensory Neural and Behavioral*  
740 *Physiology* **184**, 501-518.
- 741 **Herrel, A., Vanhooydonck, B. and Van Damme, R.** (2004). Omnivory in lacertid lizards: adaptive  
742 evolution or constraint? *Journal of Evolutionary Biology* **17**, 974-984.
- 743 **Herrel, A., Wauters, I., Aerts, P. and de Vree, F.** (1997). The mechanics of ovophagy in the beaded lizard  
744 (*Heloderma horridum*). *Journal of Herpetology* **31**, 383-393.
- 745 **Herrel, A., Deban, S. M., Schaerlaeken, V., Timmermans, J. P. and Adriaens, D.** (2009). Are  
746 Morphological Specializations of the Hyolingual System in Chameleons and Salamanders Tuned to  
747 Demands on Performance? *Physiological and Biochemical Zoology* **82**, 29-39.
- 748 **Herrel, A., Huyghe, K., Okovic, P., Lisicic, D. and Tadic, Z.** (2011). Fast and Furious: Effects of Body Size  
749 on Strike Performance in an Arboreal Viper *Trimeresurus* (*Cryptelytrops*) *albolabris*. *Journal of*  
750 *Experimental Zoology Part A-Ecological Genetics and Physiology* **315A**, 22-29.
- 751 **Herrel, A., Huyghe, K., Vanhooydonck, B., Backeljau, T., Breugelmans, K., Grbac, I., Van Damme, R. and**  
752 **Irschick, D. J.** (2008). Rapid large-scale evolutionary divergence in morphology and performance  
753 associated with exploitation of a different dietary resource. *Proceedings of the National Academy of*  
754 *Sciences of the United States of America* **105**, 4792-4795.
- 755 **Higham, T. E.** (2007a). Feeding, fins and braking maneuvers: locomotion during prey capture in  
756 centrarchid fishes. *Journal of Experimental Biology* **210**, 107-117.
- 757 **Higham, T. E.** (2007b). The integration of locomotion and prey capture in vertebrates: Morphology,  
758 behavior, and performance. *Integrative and Comparative Biology* **47**, 82-95.
- 759 **Homberger, D. G.** (2003). The comparative biomechanics of a prey-predator relationship: the adaptive  
760 morphologies of the feeding apparatus of Australian Black Cockatoos and their foods as a basis for the  
761 reconstruction of the evolutionary history of the Psittaciformes. In *Vertebrate biomechanics and*  
762 *evolution* (eds. V. L. Bels, J-P. Gasc, A. Casinos), pp. 203-228. Oxford: BIOS Scientific Publishers.
- 763 **Hotton, N.** (1955). A Survey of Adaptive Relationships of Dentition to Diet in the North American  
764 Iguanidae. *American Midland Naturalist* **53**, 88-114.
- 765 **Janoo, A. and Gasc, J.-P.** (1992). High speed motion analysis of the predatory strike and fluorographic  
766 study of the oesophageal deglutition in *Vipera ammodytes*: more than meets the eyes. *Amphibia-Reptilia*  
767 **13**, 315-325.

- 768 **Kane, E. A. and Higham, T. E.** (2011). The integration of locomotion and prey capture in divergent cottid  
 769 fishes: functional disparity despite morphological similarity. *Journal of Experimental Biology* **214**, 1092-  
 770 1099.
- 771 **Kardong, K. V. and Bels, V. L.** (1998). Rattlesnake strike behavior: Kinematics. *Journal of Experimental*  
 772 *Biology* **201**, 837-850.
- 773 **Kaufman, J. D., Burghardt, G. M. and Phillips, J. A.** (1996). Sensory cues and foraging decisions in a large  
 774 carnivorous lizard, *Varanus albigularis*. *Animal Behaviour* **52**, 727-736.
- 775 **Korzoun, L. P., Erard, C. and Gasc, J-P.** (2001). Les particularités morphofonctionnelles des appareils du  
 776 bec et hyoïdien chez les touracos (Aves, Musophagidae): relations avec la frugivorie. [Distinctive  
 777 morphofunctional features of the bill and hyoid apparatus of turacos (Aves, Musophagidae): their  
 778 relation to frugivory]. *CRAS (Hum. Services Dev.)* **324**, 965-977 (in french).
- 779 **Korzoun, L. P., Erard, C., Gasc, J-P. and Dzerzhinsky, F.** (2003). Les adaptations de l'hoazin  
 780 (*Opisthocomus hoazin*) à la folivorie. Caractéristiques morphologiques et particularités fonctionnelles  
 781 des appareils du bec et hyoïdien. [Adaptation of the Hoatzin (*Opisthocomus hoazin*) to folivory.  
 782 Distinctive morphological and functional features of its bill and hyoid apparatus]. *CRAS (Hum. Services*  
 783 *Dev.)* **326**, 75-94 (in french).
- 784 **Kupczik, K. and Stynder, D. D.** (2012). Tooth root morphology as an indicator for dietary specialization in  
 785 carnivores (Mammalia: Carnivora). *Biological Journal of the Linnean Society* **105**, 456-471.
- 786 **Liem, K. F.** (1978). Modulatory Multiplicity in Functional Repertoire of Feeding Mechanism in Cichlid  
 787 Fishes .1. Piscivores. *Journal of Morphology* **158**, 323-360.
- 788 **Losos, J. B. and Greene, H. W.** (1988). Ecological and Evolutionary Implications of Diet in Monitor  
 789 Lizards. *Biological Journal of the Linnean Society* **35**, 379-407.
- 790 **Metzger, K. A.** (2009). Quantitative analysis of the effect of prey properties on feeding kinematics in two  
 791 species of lizards. *Journal of Experimental Biology* **212**, 3751-3761.
- 792 **Metzger, K. A. and Herrel, A.** (2005). Correlations between lizard cranial shape and diet: a quantitative,  
 793 phylogenetically informed analysis. *Biological Journal of the Linnean Society* **86**, 433-466.
- 794 **Meyers, J. J. and Herrel, A.** (2005). Prey capture kinematics of ant-eating lizards. *Journal of Experimental*  
 795 *Biology* **208**, 113-127.
- 796 **Monroy, J. A. and Nishikawa, K.** (2011). Prey Capture in Frogs: Alternative Strategies, Biomechanical  
 797 Trade-Offs, and Hierarchical Decision Making. *Journal of Experimental Zoology Part a-Ecological Genetics*  
 798 *and Physiology* **315A**, 61-71.
- 799 **Montuelle, S. J., Herrel, A., Libourel, P. A., Reveret, L. and Bels, V. L.** (2009a). Locomotor-feeding  
 800 coupling during prey capture in a lizard (*Gerrhosaurus major*): effects of prehension mode. *Journal of*  
 801 *Experimental Biology* **212**, 768-777.
- 802 **Montuelle, S. J., Herrel, A., Libourel, P. A., Reveret, L. and Bels, V. L.** (2010). Separating the effects of  
 803 prey size and speed on the kinematics of prey capture in the omnivorous lizard *Gerrhosaurus major*.  
 804 *Journal of Comparative Physiology A-Neuroethology Sensory Neural and Behavioral Physiology* **196**, 491-  
 805 499.
- 806 **Montuelle, S. J., Herrel, A., Libourel, P.-A., Daillie, S. and Bels, V.** (2012). Prey capture in lizards:  
 807 differences in jaw-neck-forelimbs coordination. *Biological Journal of the Linnean Society* **105**, 607-622.
- 808 **Montuelle, S. J., Herrel, A., Schaerlaeken, V., Metzger, K. A., Mutuyeyezu, A. and Bels, V. L.** (2009b).  
 809 Inertial feeding in the teiid lizard *Tupinambis merianae*: the effect of prey size on the movements of  
 810 hyolingual apparatus and the cranio-cervical system. *Journal of Experimental Biology* **212**, 2501-2510.
- 811 **Nemeth, D. H.** (1997). Modulation of attack behavior and its effects on feeding performance in a trophic  
 812 generalist fish, *Hexagrammos decagrammus*. *Journal of Experimental Biology* **200**, 2155-2164.
- 813 **O'Grady, S. P., Morando, M., Avila, L. and Dearing, M. D.** (2005). Correlating diet and digestive tract  
 814 specialization: Examples from the lizard family Liolaemidae. *Zoology* **108**, 201-210.

- 815 **Perry, J. M., Hartstone-Rose, A. and Wall, C. E.** (2011). The jaw adductors of strepsirrhines in relation to  
816 body size, diet, and ingested food size. *Anat Rec (Hoboken)* **294**, 712-728.
- 817 **Ralston, K. R. and Wainwright, P. C.** (1997). Functional consequences of trophic specialization in  
818 pufferfishes. *Functional Ecology* **11**, 43-52.
- 819 **Reed, D. A. and Ross, C. F.** (2010). The influence of food material properties on jaw kinematics in the  
820 primate, Cebus. *Arch Oral Biol* **55**, 946-962.
- 821 **Reilly, S. M. and McBrayer, L. D.** (2007). Prey Capture and Prey Processing Behavior and the Evolution of  
822 Lingual and Sensory Characteristics: Divergences and Convergences in Lizard Feeding Biology. In *Lizard*  
823 *Ecology: the Evolutionary Consequences of Foraging Mode*, eds. S. M. Reilly L. D. McBrayer and D. B.  
824 Miles), pp. 302-333. Cambridge: University Press.
- 825 **Rice, A. N. and Westneat, M. W.** (2005). Coordination of feeding, locomotor and visual systems in  
826 parrotfishes (Teleostei: Labridae). *Journal of Experimental Biology* **208**, 3503-3518.
- 827 **Rodriguez-Robles, J. A., Bell, C. J. and Greene, H. W.** (1999). Gape size and evolution of diet in snakes:  
828 feeding ecology of erycine boas. *Journal of Zoology* **248**, 49-58.
- 829 **Santana, S. E., Dumont, E. R. and Davis, J. L.** (2010). Mechanisms of bite force production and their  
830 relationship with diet in Neotropical leaf-nosed bats. *Integrative and Comparative Biology* **50**, E155-  
831 E155.
- 832 **Santana, S. E., Strait, S. and Dumont, E. R.** (2011). The better to eat you with: functional correlates of  
833 tooth structure in bats. *Functional Ecology* **25**, 839-847.
- 834 **Schaerlaeken, V., Meyers, J. J. and Herrel, A.** (2007). Modulation of prey capture kinematics and the  
835 role of lingual sensory feedback in the lizard *Pogona vitticeps*. *Zoology* **110**, 127-138.
- 836 **Schaerlaeken, V., Herrel, A. and Meyers, J. J.** (2008). Modulation, individual variation and the role of  
837 lingual sensory afferents in the control of prey transport in the lizard *Pogona vitticeps*. *Journal of*  
838 *Experimental Biology* **211**, 2071-2078.
- 839 **Schaerlaeken, V., Montuelle, S. J., Aerts, P. and Herrel, A.** (2011). Jaw and hyolingual movements  
840 during prey transport in varanid lizards: effects of prey type. *Zoology* **114**, 165-170.
- 841 **Schwenk, K.** (2000). Feeding in Lepidosauurs. In *Feeding: Form, Function and Evolution in Tetrapod*  
842 *Vertebrates* (ed. K. Schwenk), pp. 175-290. San Francisco: Academic Press.
- 843 **Schwenk K. and Rubega M.** (2005). Diversity of Vertebrate systems. In *Physiological and Ecological*  
844 *Adaptations to feeding in Vertebrates* (eds. J. M. Starck, Wang T.), pp. 1-41. Enfield, New Hampshire:  
845 Science Publishers.
- 846 **Sherbrooke, W. C. and Schwenk, K.** (2008). Horned lizards (*Phrynosoma*) incapacitate dangerous ant  
847 prey with mucus. *Journal of Experimental Zoology Part A-Ecological Genetics and Physiology* **309A**, 447-  
848 459.
- 849 **Smith, T. L., Kardong, K. V. and Bels, V. L.** (1999). Prey capture behavior in the blue-tongued skink,  
850 *Tiliqua scincoides*. *Journal of Herpetology* **33**, 362-369.
- 851 **Urbani, J. M. and Bels, V. L.** (1995). Feeding-Behavior in 2 Scleroglossan Lizards - *Lacerta-Viridis*  
852 (*Lacertidae*) and *Zonosaurus-Laticaudatus* (*Cordylidae*). *Journal of Zoology* **236**, 265-290.
- 853 **Valdez, C. M. and Nishikawa, K. C.** (1997). Sensory modulation and behavioral choice during feeding in  
854 the Australian frog, *Cyclorana novaehollandiae*. *Journal of Comparative Physiology a-Sensory Neural and*  
855 *Behavioral Physiology* **180**, 187-202.
- 856 **Van Cakenberghe, V., Herrel, A. and Aguirre, L. F.** (2002). Evolutionary relationships between cranial  
857 shape and diet in bats (Mammalia: Chiroptera). In *Topics in Functional and Ecological Vertebrate*  
858 *Morphology*, eds. P. Aerts K. D'Aout A. Herrel and R. Van Damme), pp. 205-236: Shaker Publishing.
- 859 **Velicer, W.F. and Fava, J. L.** (1998). Effects of variable and subject sampling on factor pattern recovery.  
860 *Psychological Methods* **3**, 231-251.
- 861 **Vincent, S. E., Moon, B. R., Shine, R. and Herrel, A.** (2006). The functional meaning of "prey size" in  
862 water snakes (*Nerodia fasciata*, *Colubridae*). *Oecologia* **147**, 204-211.

863 **Vitt, L. J. and Pianka, E. R.** (2005). Deep history impacts present-day ecology and biodiversity.  
864 *Proceedings of the National Academy of Sciences of the United States of America* **102**, 7877-7881.  
865 **Vitt, L. J., Pianka, E. R., Cooper, W. E. and Schwenk, K.** (2003). History and the global ecology of  
866 squamate reptiles. *American Naturalist* **162**, 44-60.  
867 **Wainwright, P. C., Mehta, R. S. and Higham, T. E.** (2008). Stereotypy, flexibility and coordination: key  
868 concepts in behavioral functional morphology. *Journal of Experimental Biology* **211**, 3523-3528.  
869 **Young, B. A.** (2010). How a Heavy-Bodied Snake Strikes Quickly: High-Power Axial Musculature in the  
870 Puff Adder (*Bitis arietans*). *Journal of Experimental Zoology Part a-Ecological Genetics and Physiology*  
871 **313A**, 114-121.  
872  
873  
874

## FIGURE LEGENDS

**Figure 1.** Prey properties of the four prey types tested in this study. The length of each prey items was measured prior to being offered using a digital calliper. Prey mobility is represented by the maximum velocity of the prey item during the predator's approach. Maximum prey velocity was extracted from the 3D displacement of the point digitized at the insertion of the head of the prey on the prothorax or the trunk, during the predator's approach. Colored symbols represent prey types: grasshoppers in green circles, newborn mice in yellow diamonds, adult mice in red triangles and dead adult mice in blue squares.

**Figure 2.** Frame sequences illustrating prey-capture behavior in *Varanus ornatus* feeding on four prey items varying in length and mobility: grasshoppers (small/mobile; A), newborn mice (small/immobile; B), live adult mice (large/mobile; C) and dead adult mice (large/immobile; D). Each frame corresponds to an event of interest, from top to bottom: preparation of the strike, start of jaw opening, instant of maximum gape, predator-prey contact, bite. Time values are indicated, with time  $t=0$  being set at the instant of predator-prey contact.

**Figure 3.** Representative kinematic profiles associated with the movements of the feeding (jaws) and locomotor (vertebral column and forelimb) systems during prey capture in *Varanus ornatus* and *V. niloticus*. A) Gape angle is calculated as the angle between the upper and lower jaw, representing the opening-closing movements of the jaw. B) Neck height is extracted from the Z-coordinate of the point digitized on the neck, illustrating the rise of the neck above the ground with respect to its rest position. C) Elbow angle is calculated as the angle between the shoulder point, the elbow point and the wrist point, quantifying the flexion-extension movements of the forelimb. Time  $t=0$  was set at the instant of predator-prey contact (dash line) so that negative time values represent events occurring before predator-prey contact, whereas positive time values represents events occurring after. Colored symbols represent prey types: grasshoppers in green circles, newborn mice in yellow diamonds, adult mice in red triangles and dead adult mice in blue squares.

**Figure 4.** Schematics illustrating the calculation of latency of maximum neck elevation with respect to jaw opening, which is used to determine the jaw-neck coordination pattern. First, both neck elevation (top) and gape angle (bottom) profiles are synchronized in time according to  $t = 0$  at the instant of predator-prey contact. Then, the difference in time between maximum neck elevation (blue dotted arrow) and jaw opening (black dashed line) is calculated. Three cases are illustrated. A) Maximum neck elevation is synchronized with jaw opening: latency with respect to jaw opening is nul.

B) Maximum neck elevation occurs before jaw opening: latency with respect to jaw opening is represented by a negative value. C) Maximum neck elevation occurs later in the jaw opening phase (e.g., close to maximum gape angle): latency with respect to jaw opening is represented by a positive value. Latency of forelimb flexion at the elbow joint and latency of forelimb extension at the elbow joint are calculated using the same procedure. Modified from Montuelle et al., 2012.

**Figure 5.** Multivariate spaces representing variation in the kinematics associated with neck elevation (A), and elbow configuration (B) during prey capture behavior in *Varanus ornatus* and *V. niloticus* feeding on different prey types. For each factor, the percentage of variance explained is indicated, as well as the kinematic variables loading on (see Table 2 for the complete composition of the multivariate factors). Colored symbols represent prey types: grasshoppers in green circles, newborn mice in yellow diamonds, adult mice in red triangles and dead adult mice in blue squares.

**Figure 6.** Bivariate correlations between the multivariate factors representing jaw movements, and the ones representing neck and forelimb movements, illustrating jaw-neck-forelimb integration during prey capture behavior in *Varanus ornatus* and *V. niloticus*. Jaw factor is correlated with neck factor 2 during the capture of grasshoppers and adult mice (A), indicating the timing of neck elevation is associated with the time and amplitude of maximum gape during the capture of evasive prey. Jaw factor is also correlated with neck factor 1 (B) and elbow factor 2 (C) during the capture of adult mice, indicating the amplitude of maximum neck elevation and the amplitude of elbow angle are both associated with the time and amplitude of maximum gape. The kinematic variables loading on each factor are indicated (see Table 2 for the complete composition of the factors). Colored symbols represent prey types: grasshoppers in green circles, and adult mice in red triangles. Only the significant correlations are presented: note no bivariate correlation was found significant for immobile prey (i.e., newborn mice, dead adult mice).

**Figure 7.** Flexibility of jaw-neck-forelimb coordination in response to prey type during prey capture behavior in *Varanus ornatus* and *V. niloticus* feeding on different prey types. Latency (i.e., time difference) of maximum neck elevation, maximum elbow angle and minimum elbow angle with respect to jaw opening are calculated for each prey type: grasshoppers (A), newborn mice (B), adult mice (C), and dead mice (D). Low latency values indicate events occurring close to the start of jaw opening, whereas high latency values indicate events occurring later in the jaw opening phase (i.e., closer to maximum gape and predator-prey contact; see Materials & Methods). Long-dash lines represent the start of jaw opening (at latency = 0; see Figure 4A), short-dash line represents the instant of maximum gape, and solid line represents the instant of



predator-prey contact. Colored symbols represent outliers: grasshoppers in green circles, newborn mice in yellow diamonds, adult mice in red triangles and dead adult mice in blue squares.

**Figure 8.** Effect of prey mobility on jaw-forelimb coordination during prey capture behavior in *Varanus ornatus* and *V. niloticus* feeding on evasive prey (grasshoppers and adult mice). A) Maximum prey velocity is correlated with the latency of minimum elbow angle indicating the capture of quick prey involves the flexion of the forelimb at the elbow joint being delayed in the jaw opening phase. B) Maximum prey velocity is correlated with the latency of maximum elbow angle during the capture of grasshoppers, indicating the capture of quick prey involves the extension of the forelimb at the elbow joint occurring earlier in the jaw opening phase. Colored symbols represent prey types: grasshoppers in green circles, and adult mice in red triangles. Only the significant correlations are presented. Only the significant correlations are presented: note no bivariate correlation between maximum prey velocity and the latency of maximum neck elevation with respect to jaw opening was found significant.

**Figure 9.** Synthesis of the study. In prey capture behavior of varanid lizards, the effects of prey mobility on the jaw, neck and forelimbs movements, and on their integration, appear to supersede the effects of prey size (here quantified by prey length). At the bottom, a time scale from prey approach to predator-prey contact to highlight the time dimension of the proposed decision making process: varanids are hypothesized to assess prey mobility first as they stop further away from evasive prey to avoid eliciting anti-predator response, then using specific strike strategies in response to the secondary properties of the prey (e.g., length). The figure of reference for each statement is indicated. Inspired from Monroy & Nishikawa, 2011.

## Montuelle et al. Figure 1

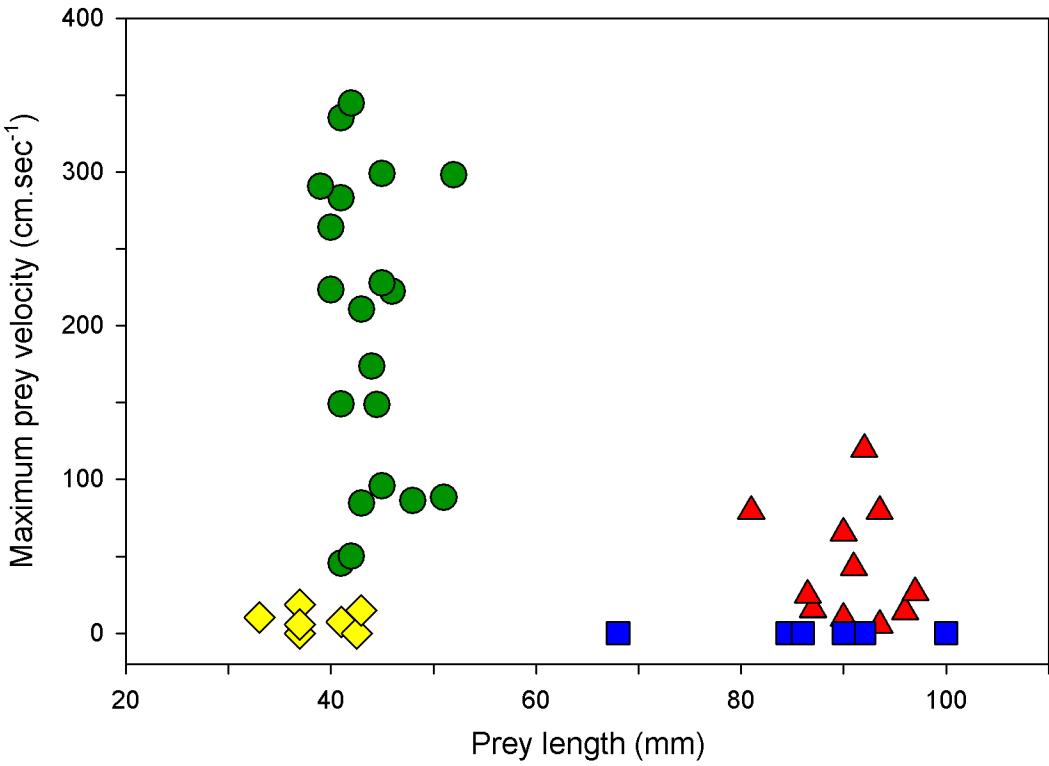

Montuelle et al. Figure 2

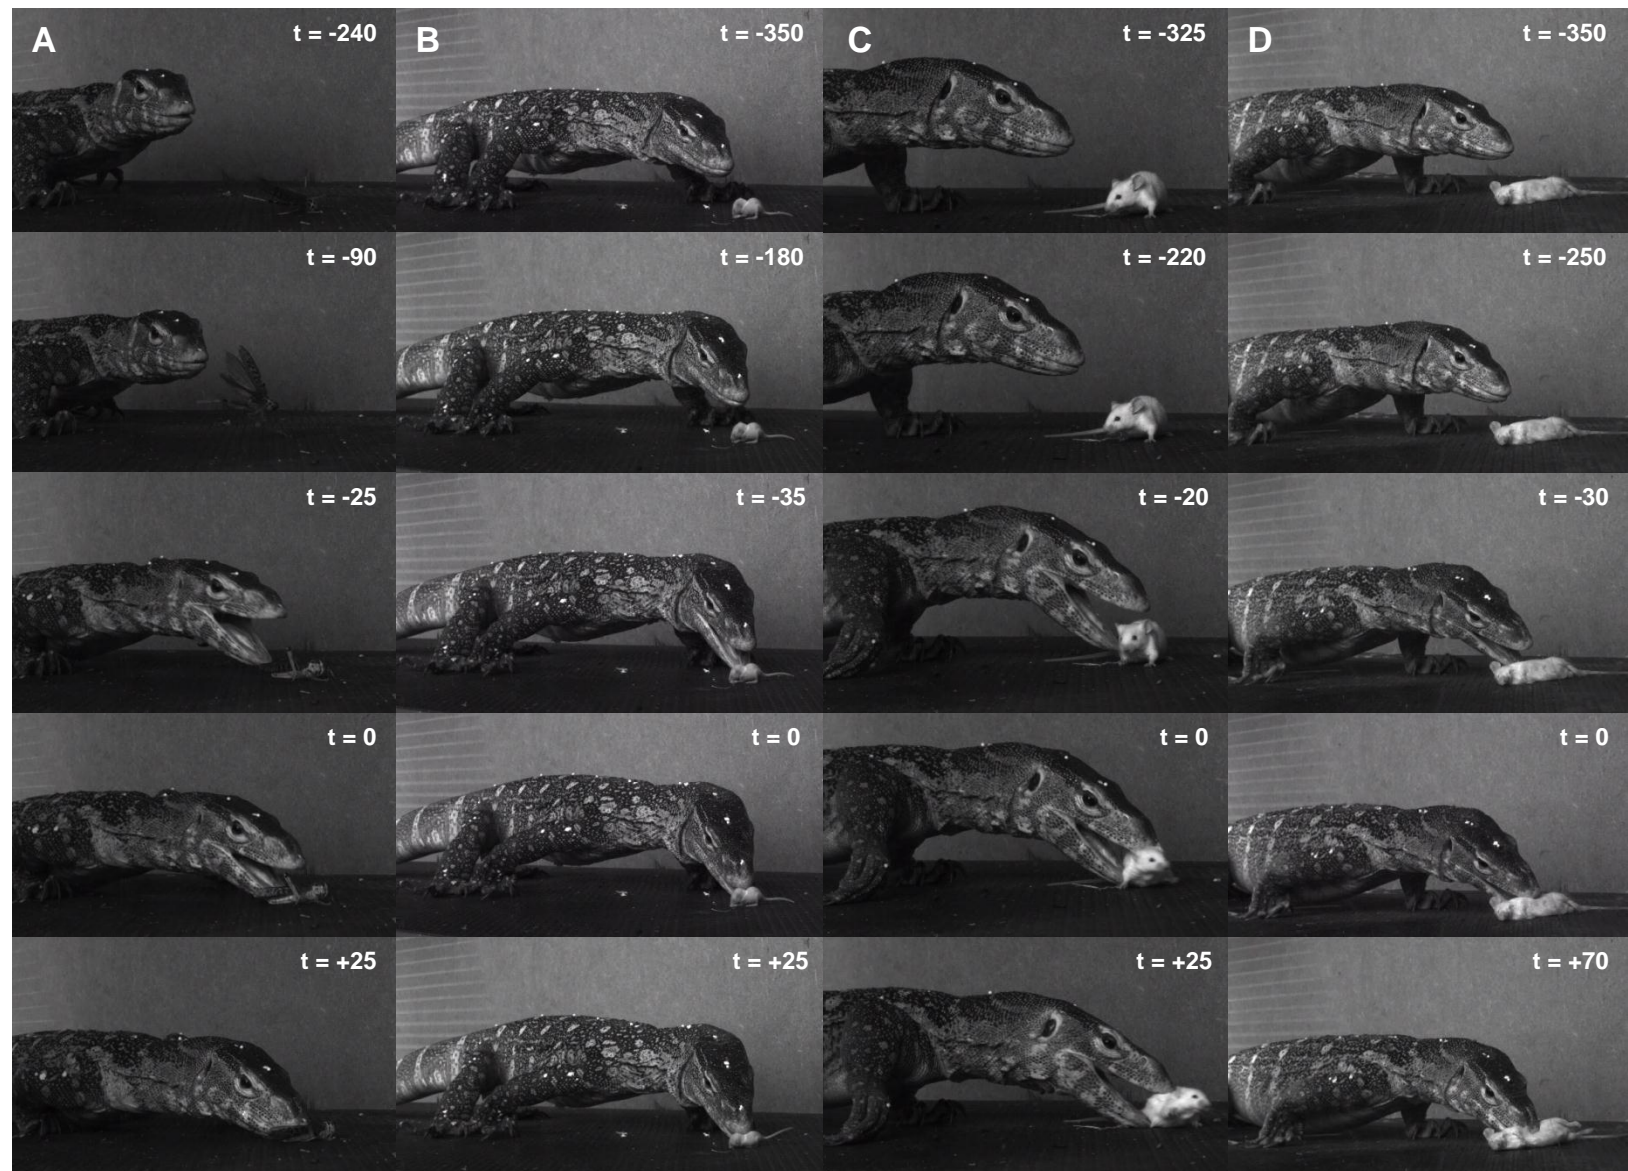

# Montuelle et al. Figure 3

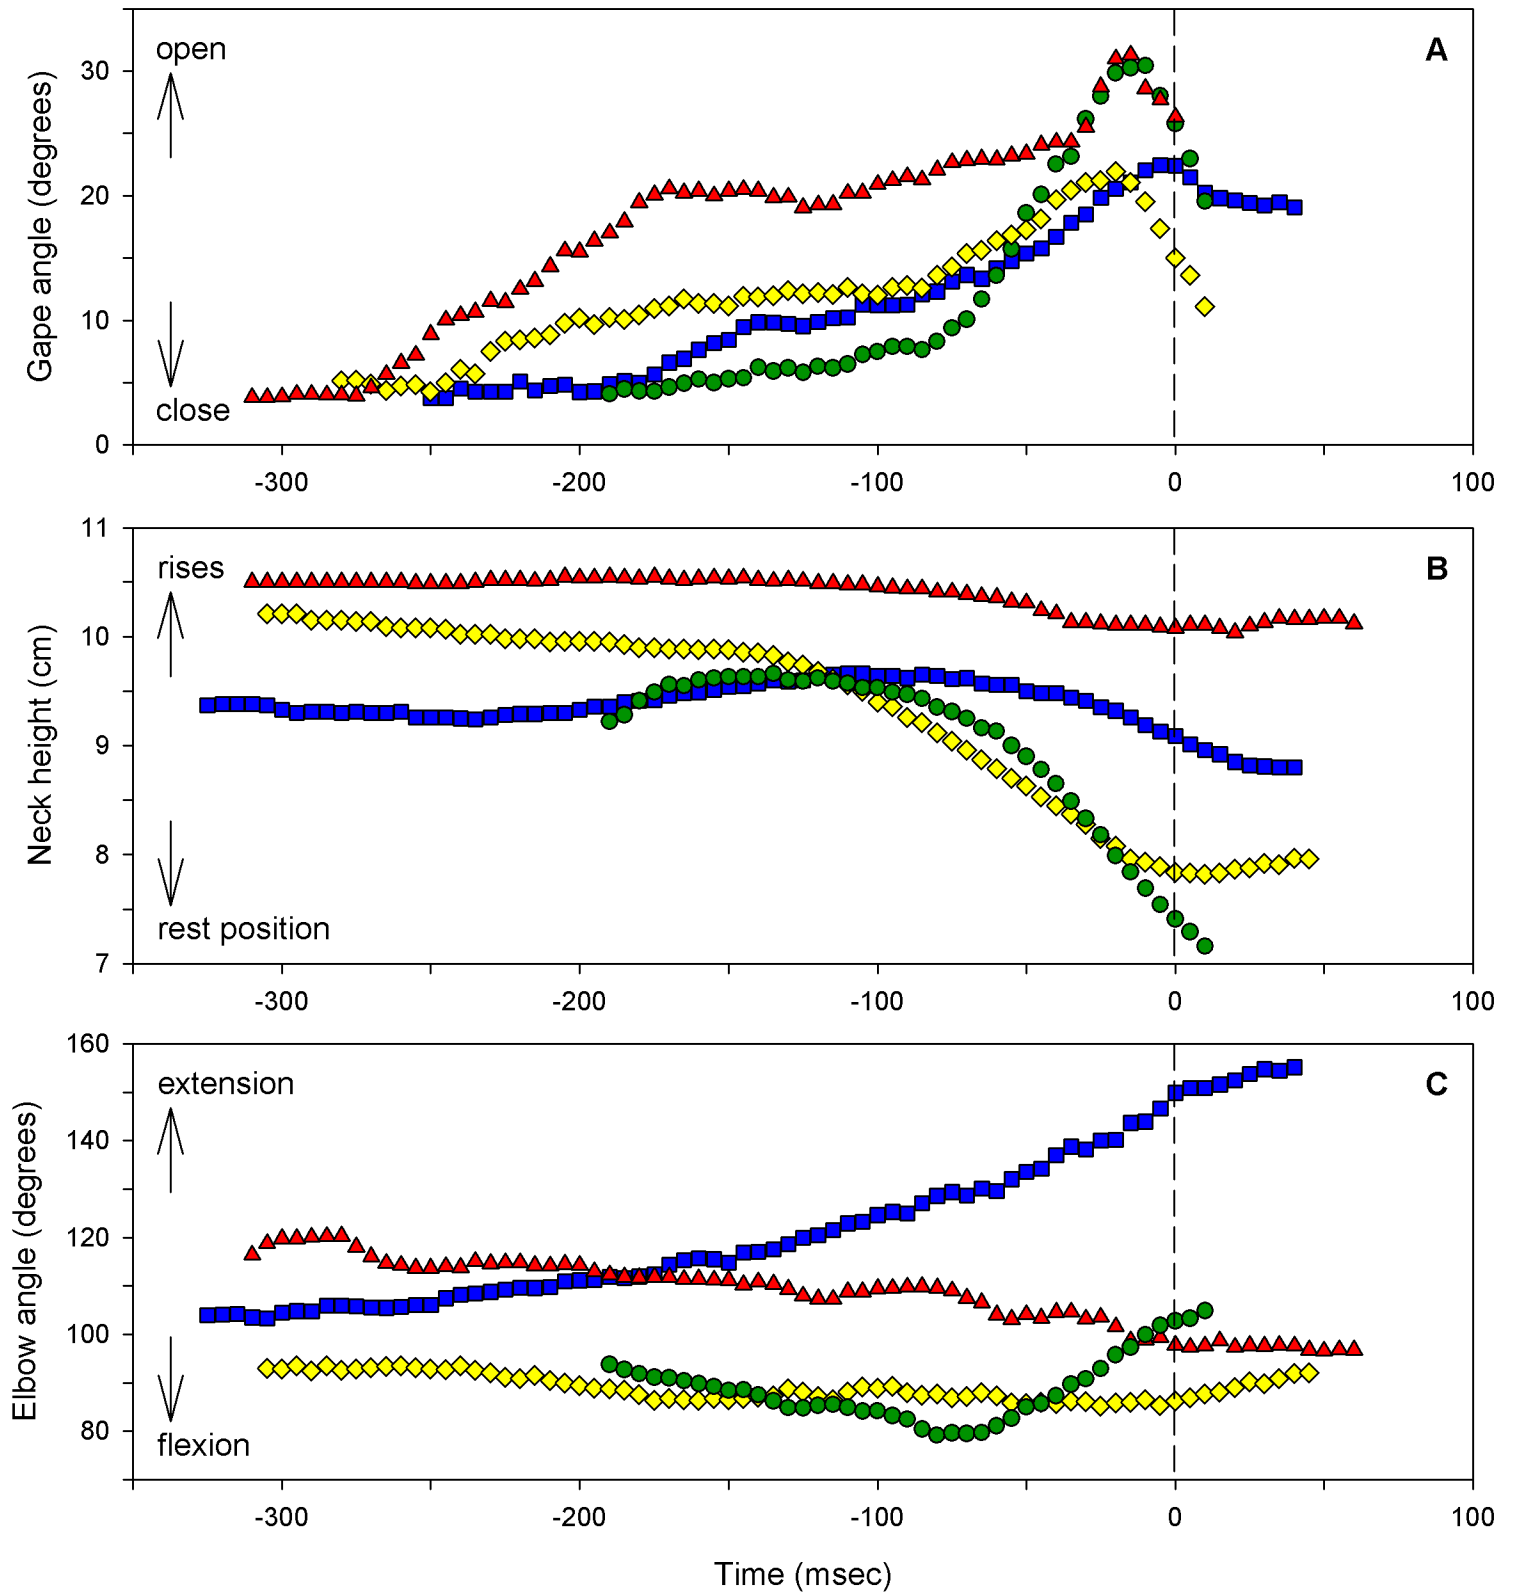

Montuelle et al. Figure 4

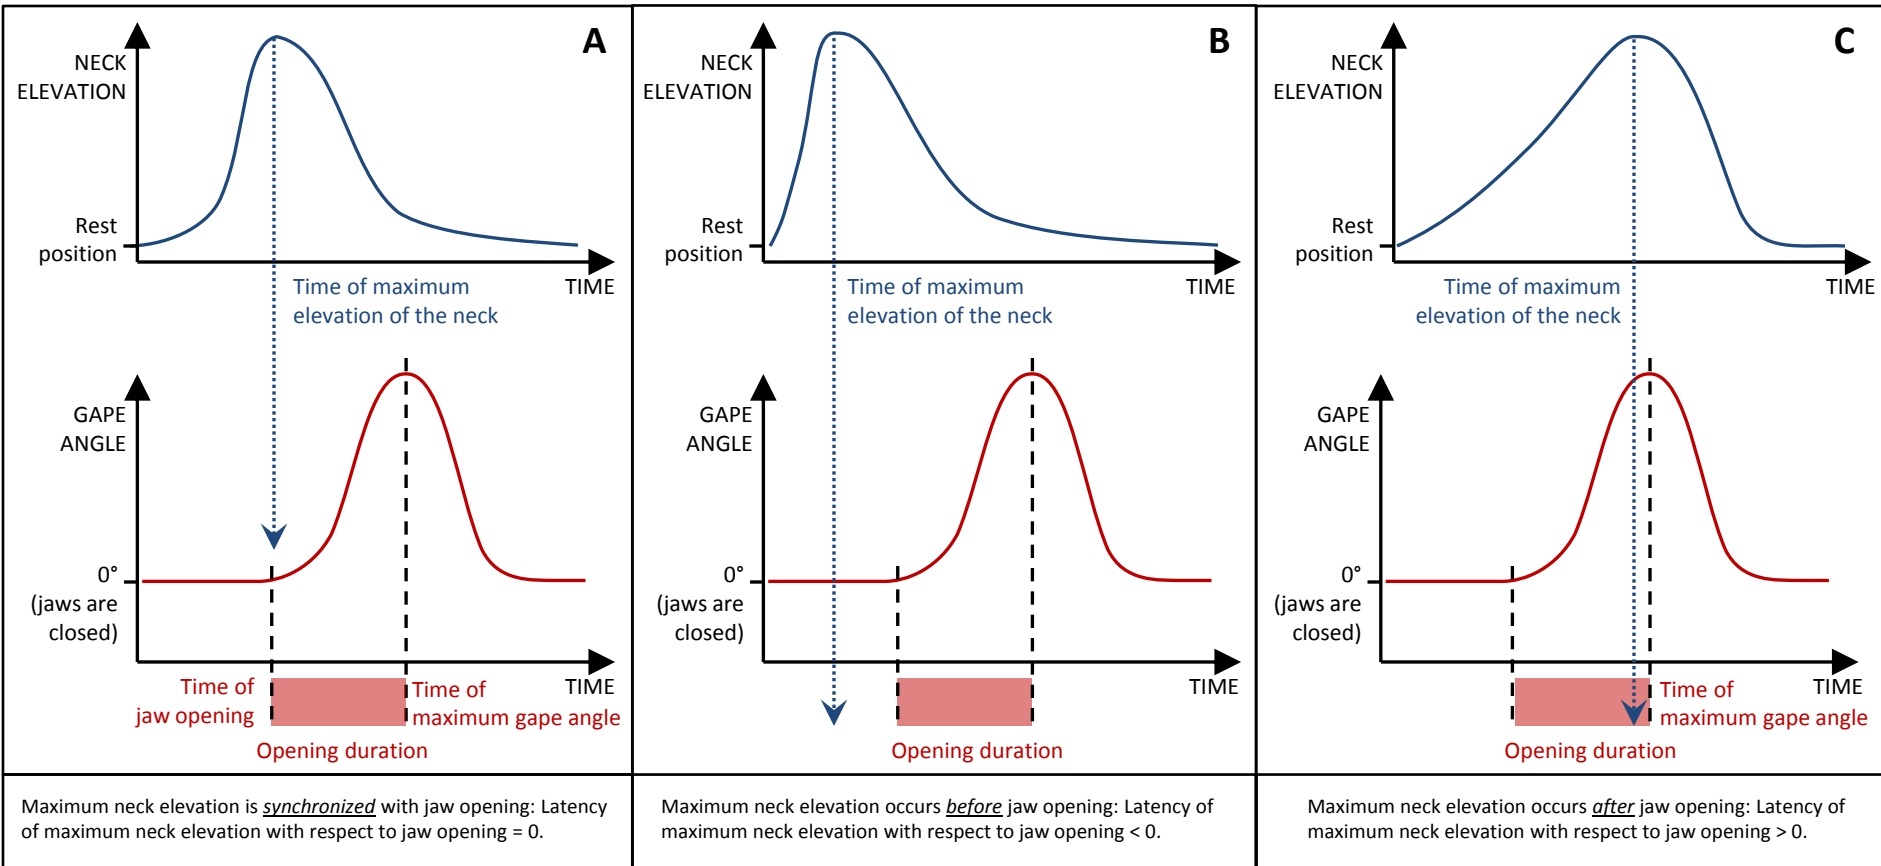

# Montuelle et al. Figure 5

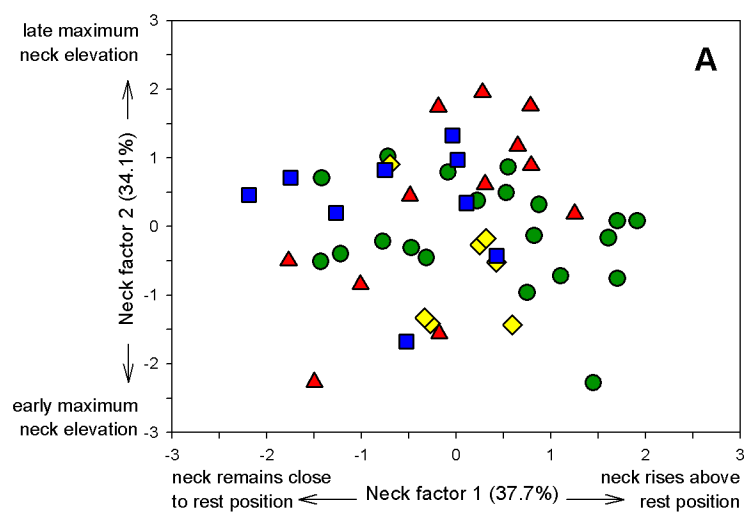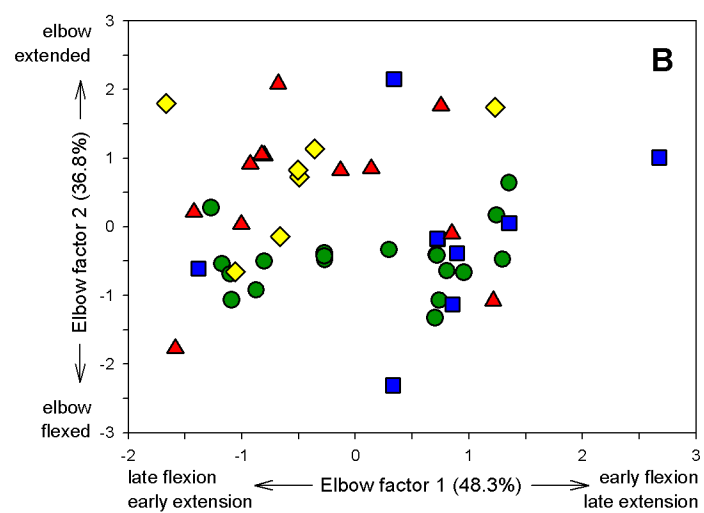

## Montuelle et al. Figure 6

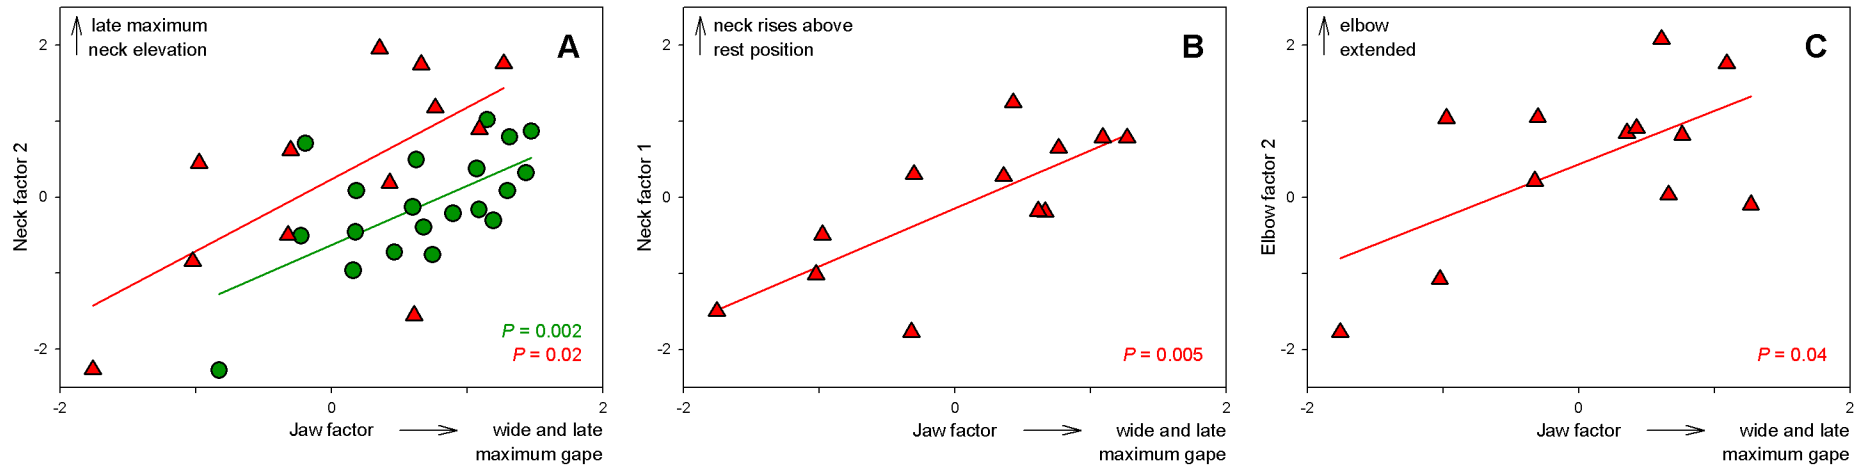



# Montuelle et al. Figure 7

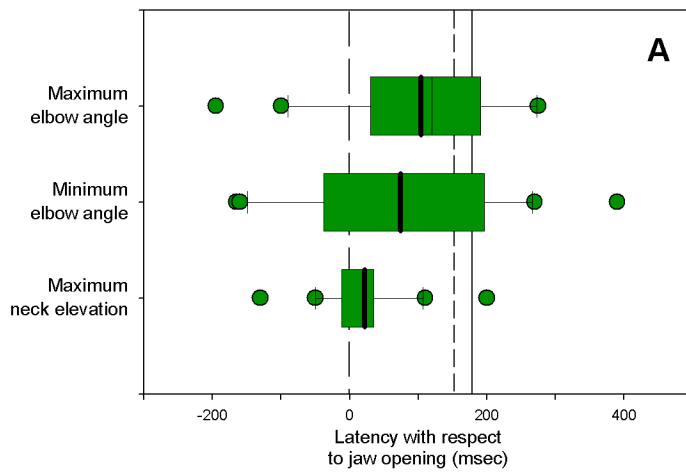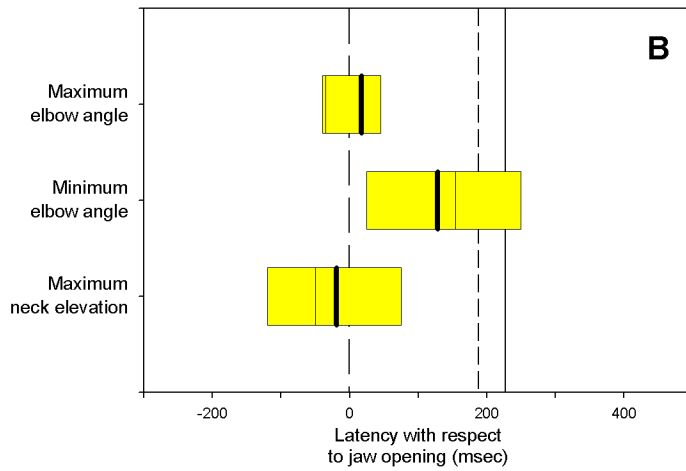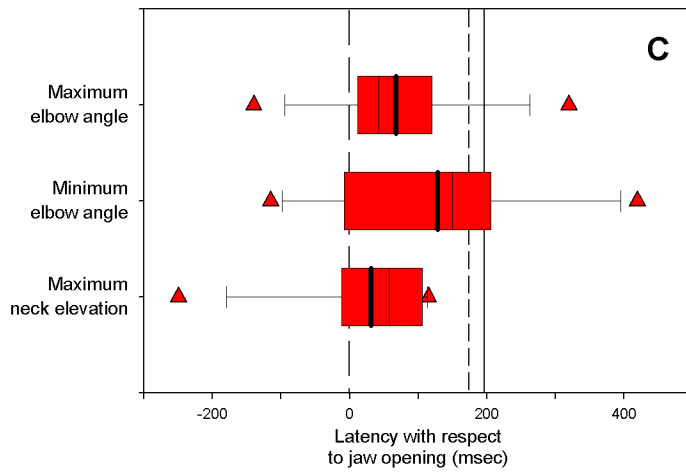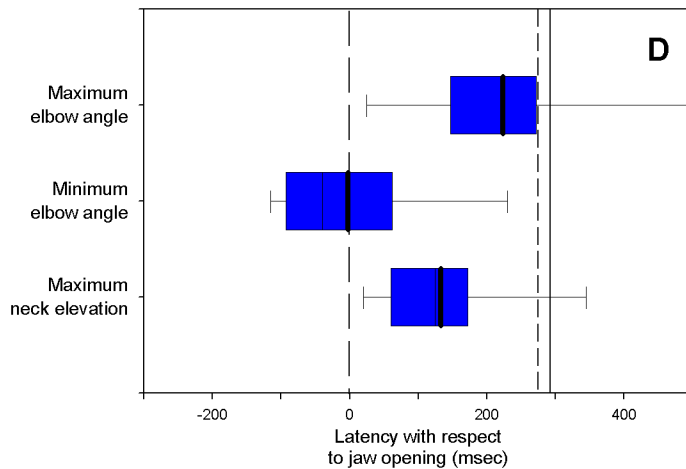

# Montuelle et al. Figure 8

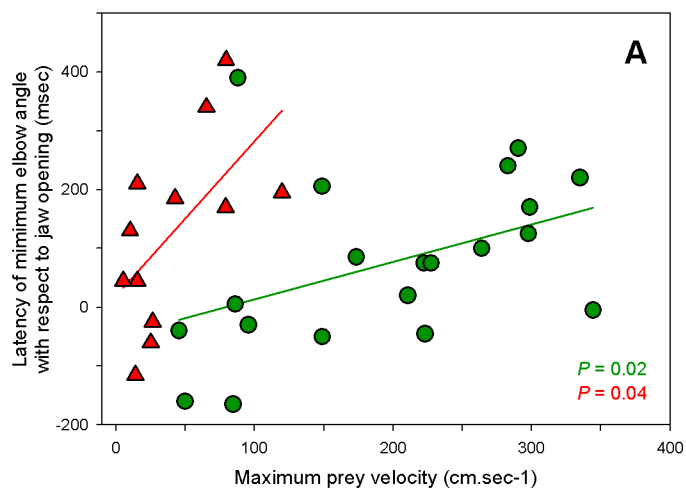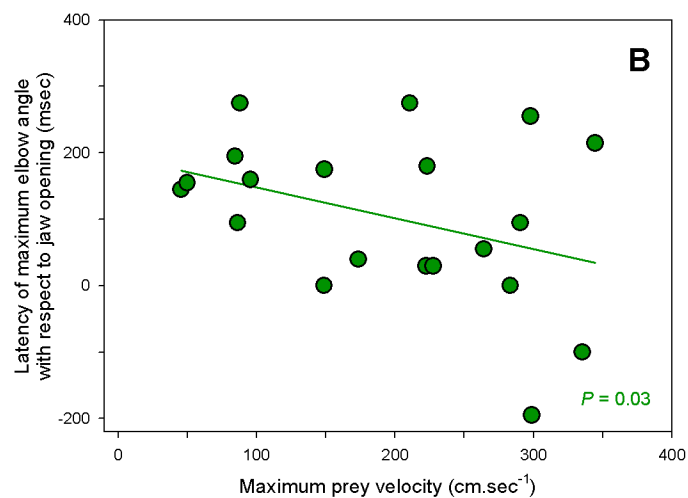

Montuelle et al. Figure 9

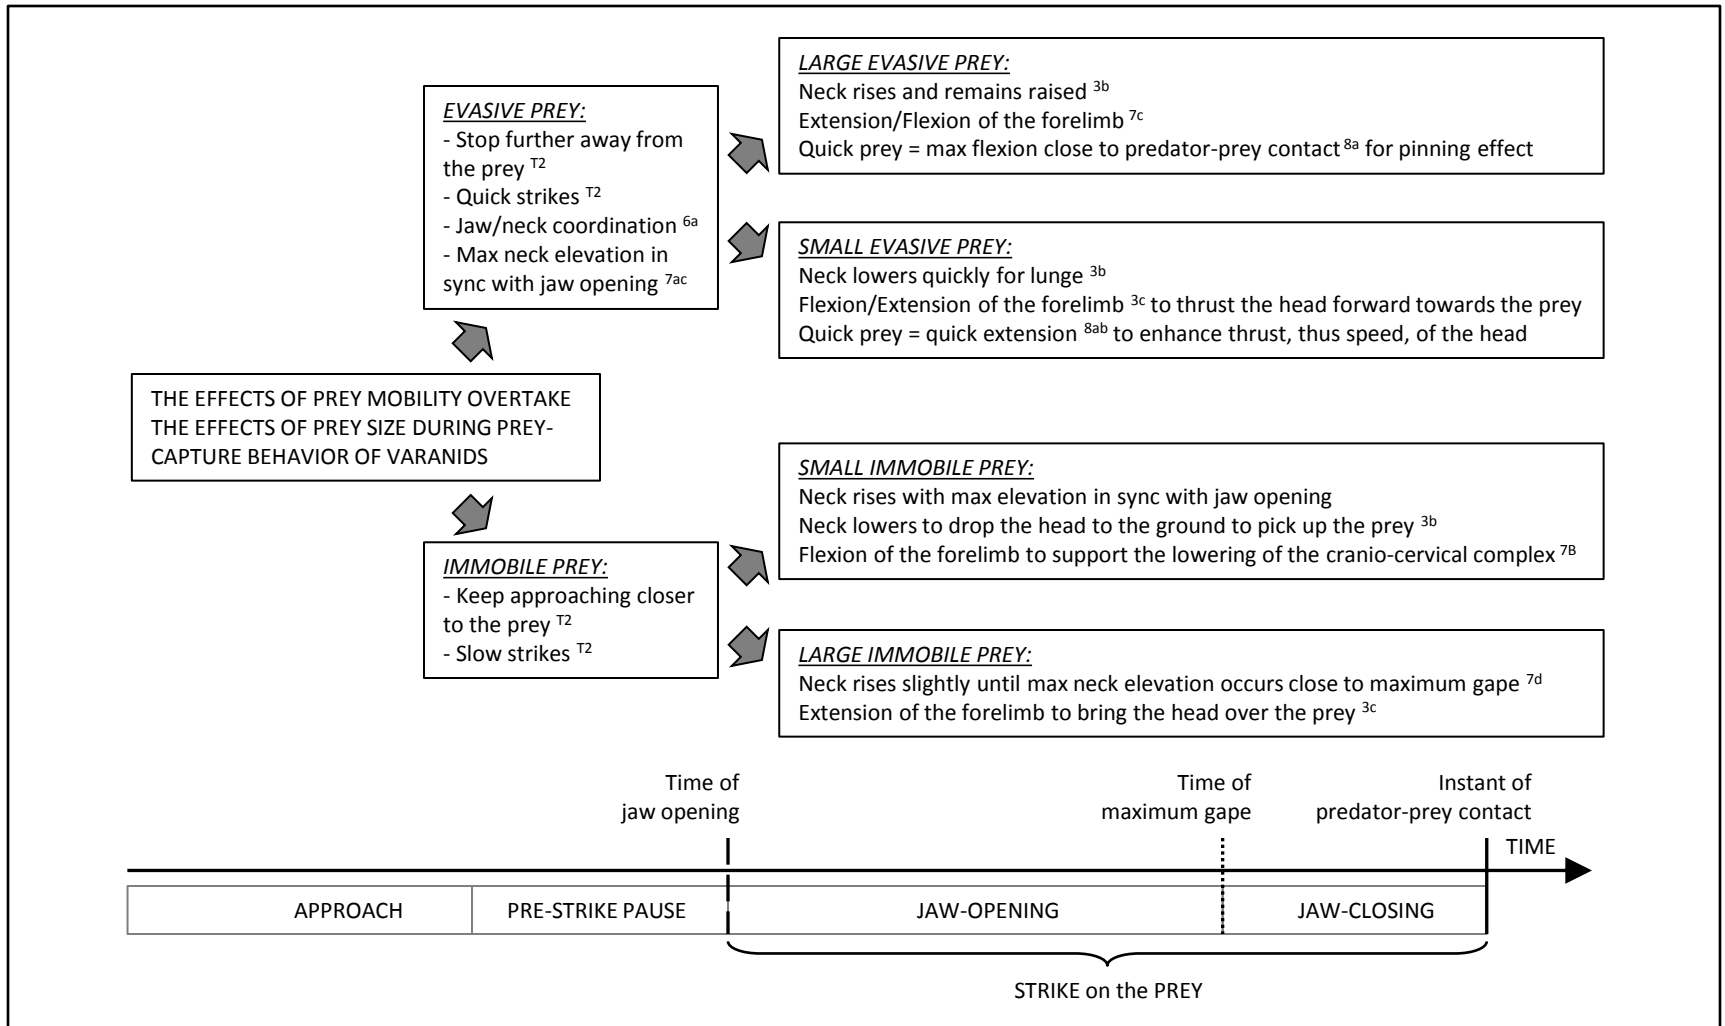

**Table 1.** Summary of the kinematic variables associated with jaw movements, neck elevation and forelimb flexion-extension at the elbow joint during prey capture behavior of *Varanus niloticus* and *V.ornatus*. The capture of four different prey types varying in length and mobility were recorded (see Figure 2). *N* represents the number of sequence analyzed.

|                                                                                                        | Grasshopper<br><i>N</i> = 20 | Newborn mice<br><i>N</i> = 7 | Adult mice<br><i>N</i> = 12 | Dead adult mice<br><i>N</i> = 9 |
|--------------------------------------------------------------------------------------------------------|------------------------------|------------------------------|-----------------------------|---------------------------------|
| Prey length (cm)                                                                                       | 4.37 ± 0.79                  | 3.86 ± 1.37                  | 9.04 ± 1.30                 | 87.06 ± 2.86                    |
| Prey length category                                                                                   | Small                        | Small                        | Large                       | Large                           |
| Maximum prey speed (cm.sec <sup>-1</sup> )                                                             | 195.9 ± 21.8                 | 1.7 ± 1.5                    | 41.5 ± 10.5                 | 0                               |
| Prey mobility category                                                                                 | Mobile                       | Immobile                     | Mobile                      | Immobile                        |
| <u><i>Jaw movements</i></u>                                                                            |                              |                              |                             |                                 |
| Time of the start of jaw opening (msec)                                                                | -176 ± 15                    | -226 ± 26                    | -195 ± 27                   | -288 ± 30                       |
| Maximum gape angle (degrees)                                                                           | 32.8 ± 0.7                   | 19.6 ± 1.5                   | 28.3 ± 1.0                  | 24.4 ± 1.1                      |
| Time of maximum gape angle (msec)                                                                      | -23 ± 4                      | -35 ± 7                      | -28 ± 4                     | -12 ± 7                         |
| <u><i>Neck movements</i></u>                                                                           |                              |                              |                             |                                 |
| Maximum neck elevation (cm)                                                                            | 4.74 ± 0.39                  | 5.44 ± 0.13                  | 5.68 ± 0.58                 | 4.68 ± 0.56                     |
| Time of maximum neck elevation (msec)                                                                  | -154 ± 18                    | -244 ± 34                    | -163 ± 34                   | -154 ± 31                       |
| Latency of maximum neck elevation (msec) <sup>1</sup>                                                  | 22 ± 15                      | -19 ± 40                     | 32 ± 29                     | 133 ± 32                        |
| Variation of neck elevation during the strike (cm)                                                     | -2.22 ± 0.23                 | -1.28 ± 0.26                 | -0.87 ± 0.19                | -0.59 ± 0.17                    |
| <u><i>Forelimb movements</i></u>                                                                       |                              |                              |                             |                                 |
| Minimum elbow angle (degrees)                                                                          | 82.9 ± 1.6                   | 113.2 ± 6.6                  | 105.9 ± 6.9                 | 91.2 ± 8.1                      |
| Time of minimum elbow angle (msec)                                                                     | -102 ± 27                    | -97 ± 49                     | -67 ± 32                    | -291 ± 48                       |
| Latency of minimum elbow angle (msec) <sup>1</sup>                                                     | 74 ± 32                      | 128 ± 67                     | 128 ± 46                    | -3 ± 36                         |
| Maximum elbow angle (degrees)                                                                          | 108.0 ± 3.0                  | 127.2 ± 8.2                  | 124.4 ± 6.6                 | 112.6 ± 10.0                    |
| Time of maximum elbow angle (msec)                                                                     | -72 ± 27                     | -208 ± 49                    | -128 ± 40                   | -64 ± 26                        |
| Latency of maximum elbow angle (msec) <sup>1</sup>                                                     | 104 ± 28                     | 18 ± 37                      | 68 ± 31                     | 223 ± 43                        |
| Variation of elbow angle during the strike (degrees)                                                   | 0.9 ± 3                      | -2.6 ± 2.6                   | -4.2 ± 3.4                  | 6.8 ± 7.1                       |
| <u><i>Strike performance</i></u>                                                                       |                              |                              |                             |                                 |
| Predator-prey distance at jaw opening (cm)                                                             | 12.84 ± 1.39                 | 7.68 ± 0.32                  | 9.05 ± 0.78                 | 8.52 ± 0.62                     |
| Maximum head velocity during the strike (cm.sec <sup>-1</sup> )                                        | 103.3 ± 8.9                  | 61.4 ± 8.0                   | 101.7 ± 11.8                | 47.0 ± 6.0                      |
| Table entries are means ± standard errors of the mean.<br>1: standardized with respect to jaw opening. |                              |                              |                             |                                 |

**Table 2.** Summary of the factor analysis performed on the kinematic variables associated with jaw movements, neck elevation and forelimb flexion-extension at the elbow joint during prey capture behavior of *Varanus niloticus* and *V.ornatus*. Values in bold are loadings greater than 0.70 (Velicer and Fava 1998).

|                            | JAW FACTOR<br>(50.85%) |
|----------------------------|------------------------|
| Time to jaw opening        | <b>0.865</b>           |
| Maximum gape angle         | <b>0.845</b>           |
| Time to maximum gape angle | 0.251                  |

|                                            | NECK FACTOR 1<br>(37.71%) | NECK FACTOR 2<br>(34.08%) |
|--------------------------------------------|---------------------------|---------------------------|
| Maximum neck elevation                     | <b>0.776</b>              | 0.304                     |
| Time to maximum elevation of the neck      | -0.001                    | <b>0.934</b>              |
| Variation of neck height during the strike | <b>-0.724</b>             | 0.304                     |

|                                            | ELBOW FACTOR 1<br>(48.27%) | ELBOW FACTOR 2<br>(36.82%) |
|--------------------------------------------|----------------------------|----------------------------|
| Minimum elbow angle                        | -0.24                      | <b>0.969</b>               |
| Time to minimum elbow angle                | <b>-0.883</b>              | -0.045                     |
| Maximum elbow angle                        | 0.098                      | <b>0.965</b>               |
| Time to maximum elbow angle                | <b>0.876</b>               | -0.072                     |
| Variation of elbow angle during the strike | <b>0.895</b>               | 0.135                      |

**Table 3.** Summary of the prey type effects on jaw and forelimb kinematics for each individual. Analyses of variance performed on the multivariate factors (see Table 2) reveal that the prey type x individual interaction term is significant on the Jaw factor and on Elbow factor 2, indicating different prey type effects in each individual. Consequently, prey type effects were tested for each individual separately, and the significant Bonferroni's post-hoc tests are reported here to identify which prey type differs from the others.

|                | individual #1<br><i>Varanus ornatus</i>                                                                                        | individual #2<br><i>Varanus ornatus</i>                                                                                     | individual #3<br><i>Varanus niloticus</i> |
|----------------|--------------------------------------------------------------------------------------------------------------------------------|-----------------------------------------------------------------------------------------------------------------------------|-------------------------------------------|
| JAW FACTOR     | newborn mice < grasshoppers ( $P = 0.002$ )<br>newborn mice < dead mice ( $P = 0.007$ )                                        | newborn mice < grasshoppers ( $P = 0.004$ )<br>dead mice < grasshoppers ( $P < 0.001$ )<br>dead mice < mice ( $P = 0.016$ ) | grasshoppers > mice ( $P = 0.042$ )       |
| ELBOW FACTOR 2 | grasshoppers < mice ( $P = 0.008$ )<br>newborn mice > grasshoppers ( $P = 0.002$ )<br>newborn mice > dead mice ( $P = 0.025$ ) | grasshoppers < mice ( $P = 0.026$ )                                                                                         |                                           |
